# Supplementary material for: Regioselective synthesis of 2-(2-hydroxyaryl)pyridines from the reactions of benzynes with pyridine N-oxides
Source: Royal Society of Chemistry journal article supplement (doi:10.1039/c2ob26130h), 2012-01-01

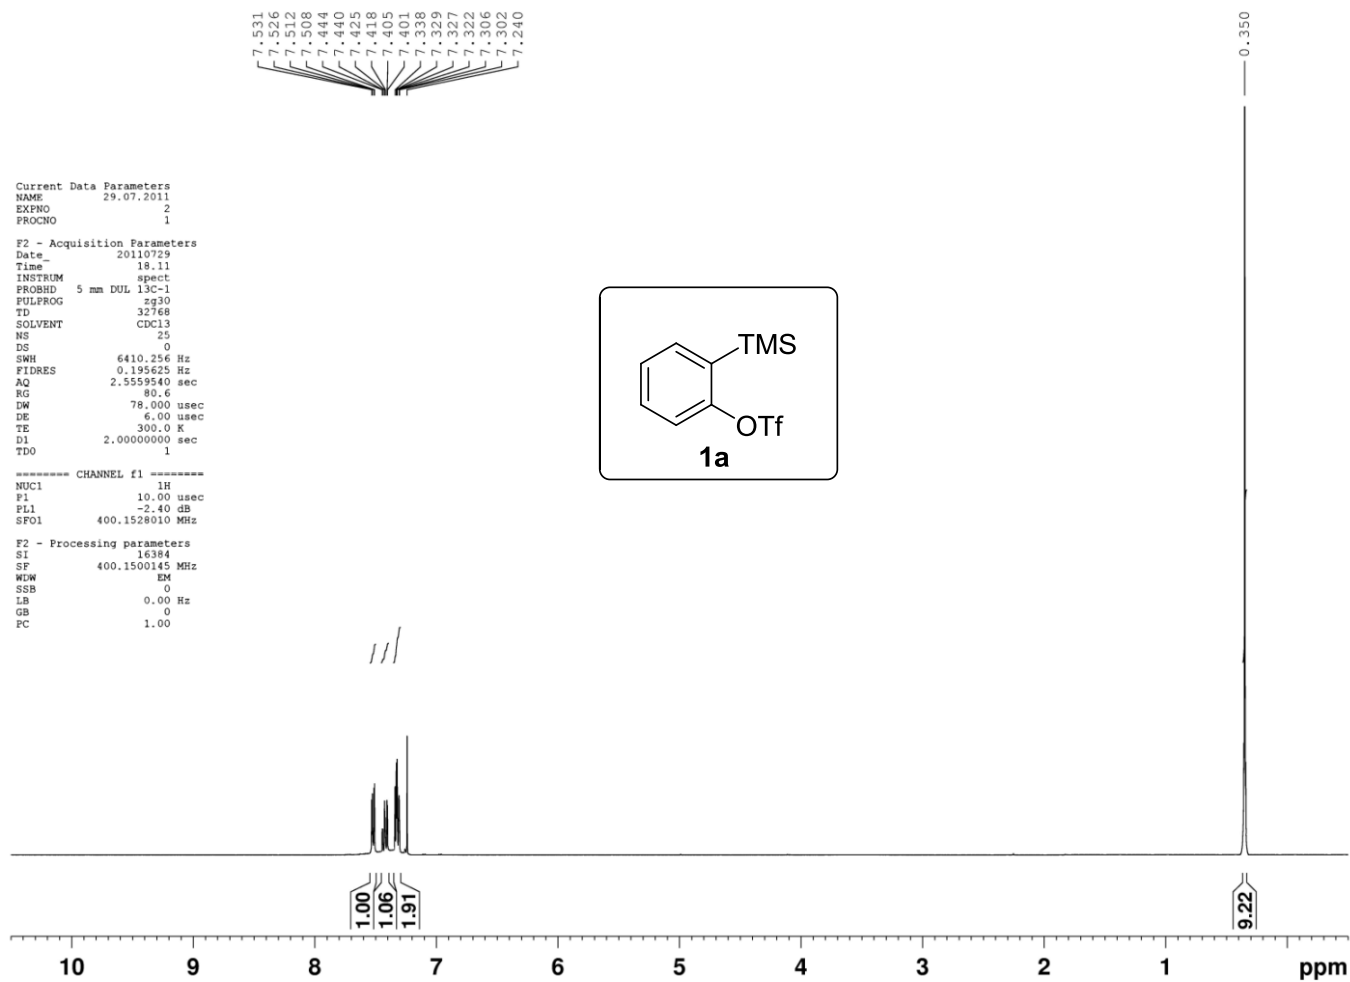

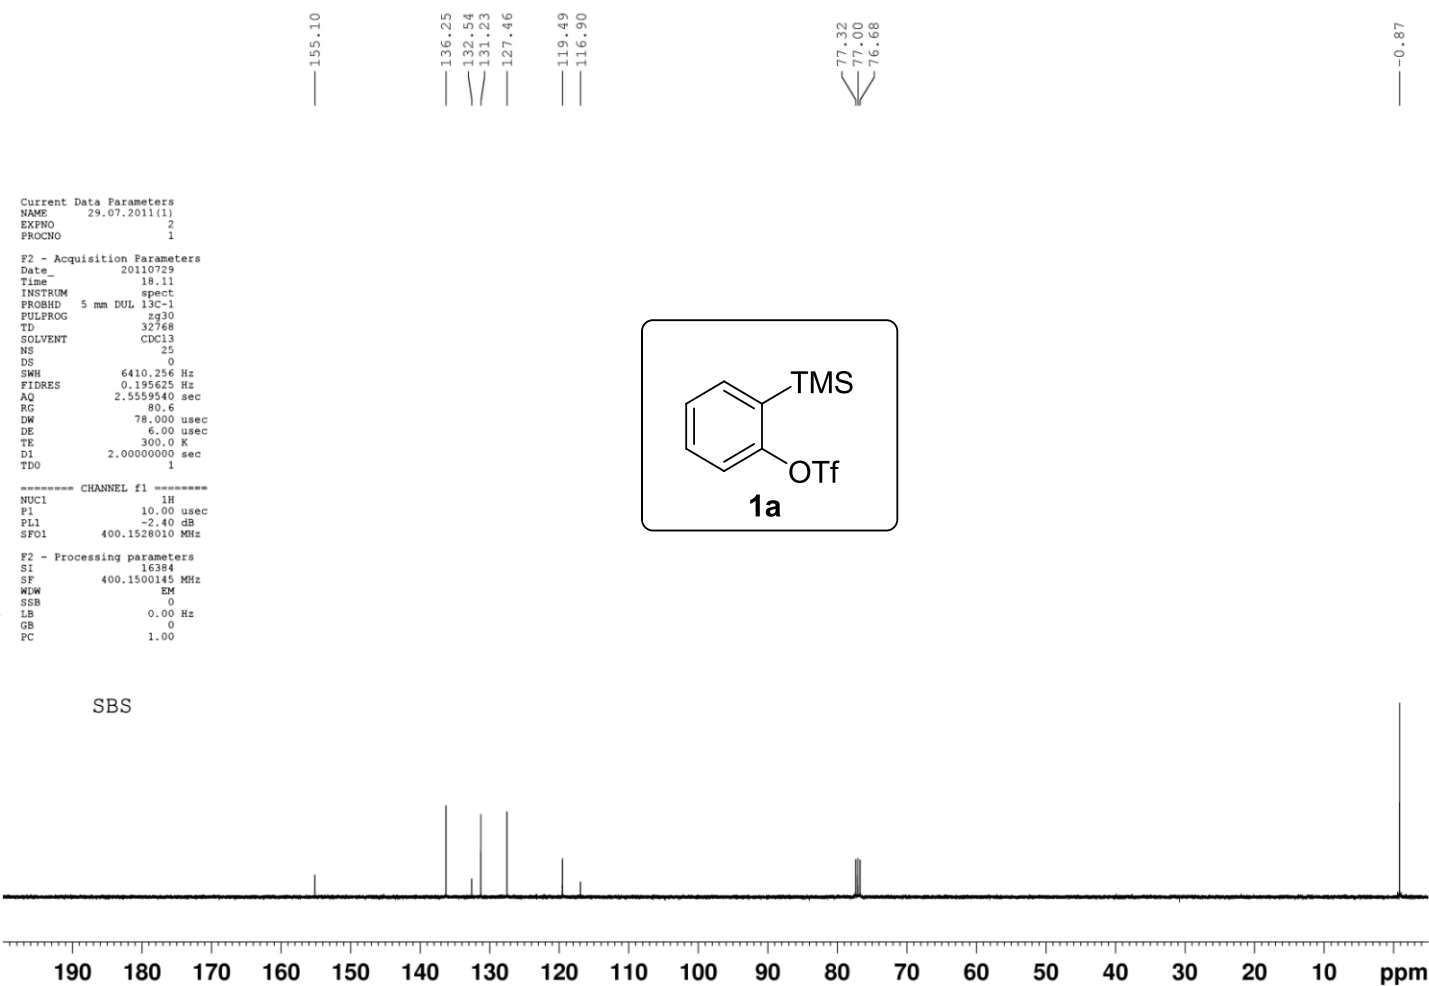

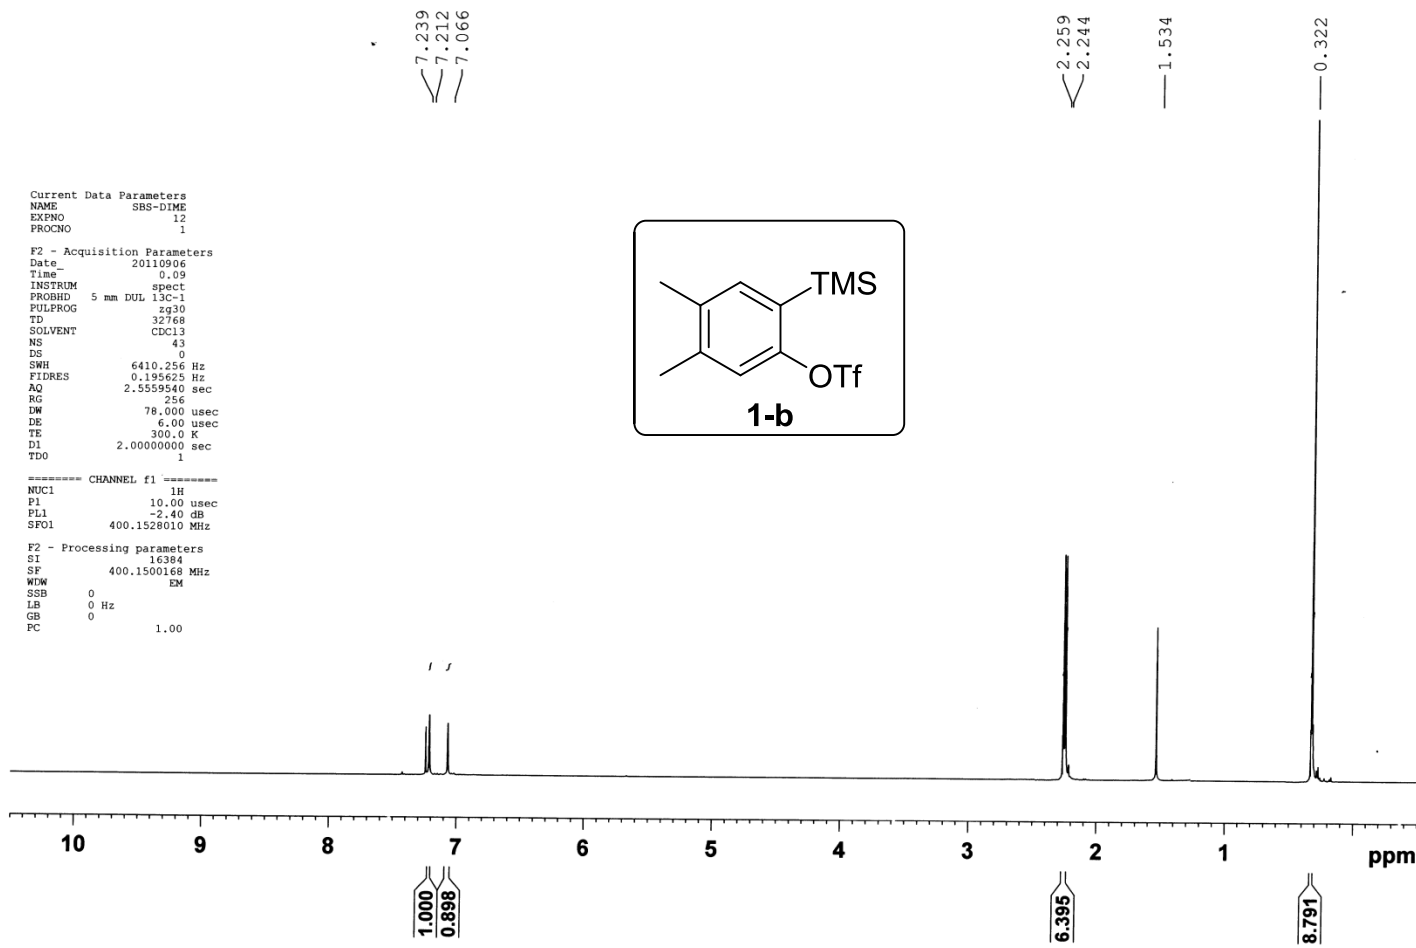

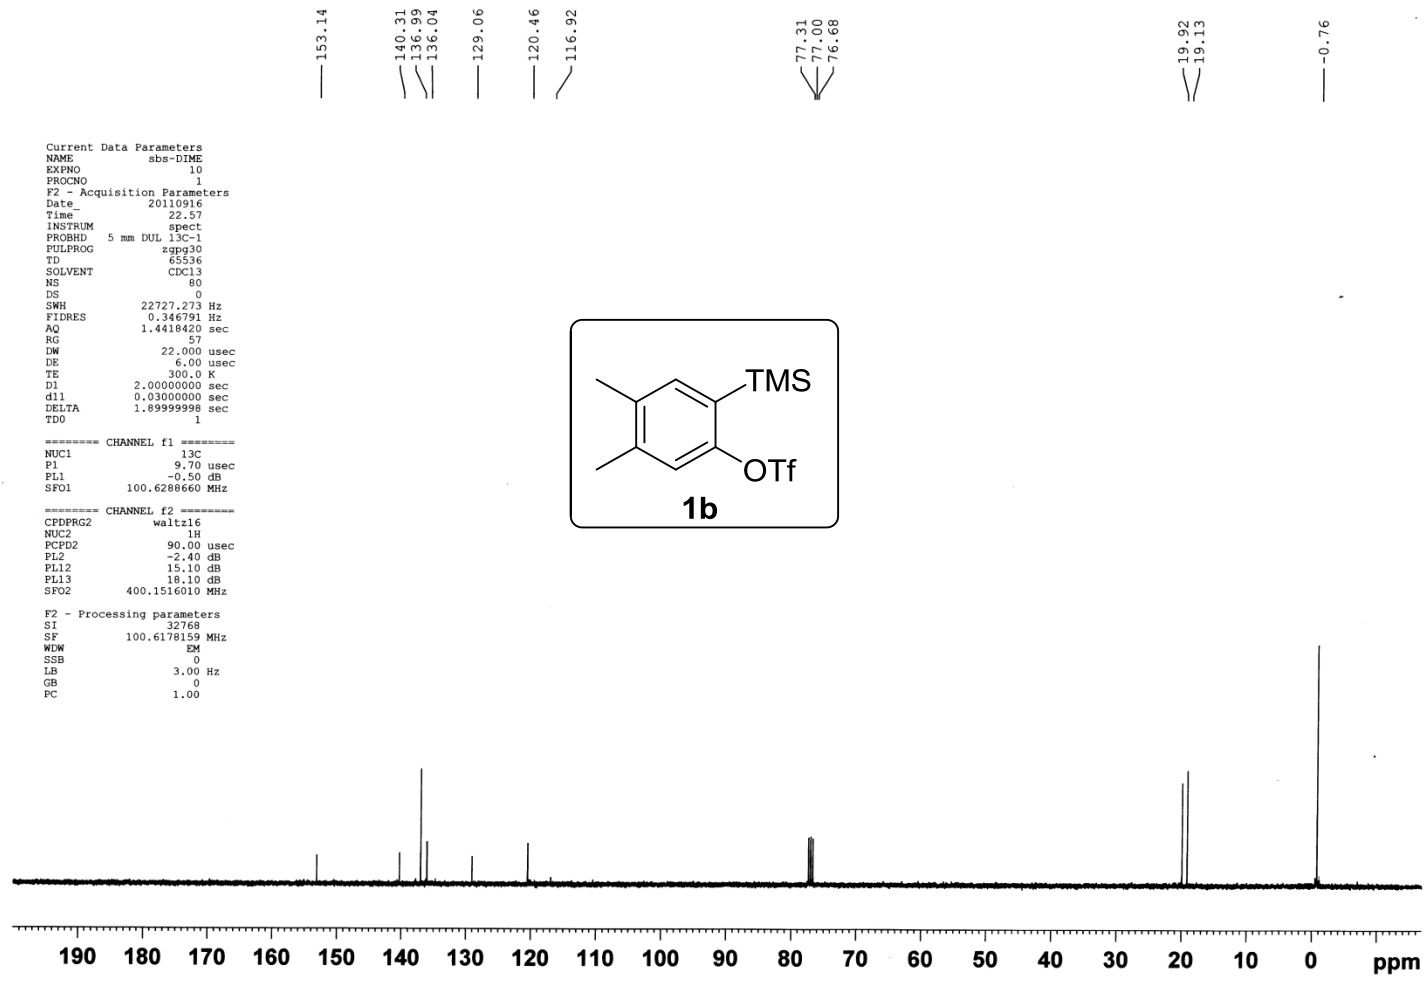

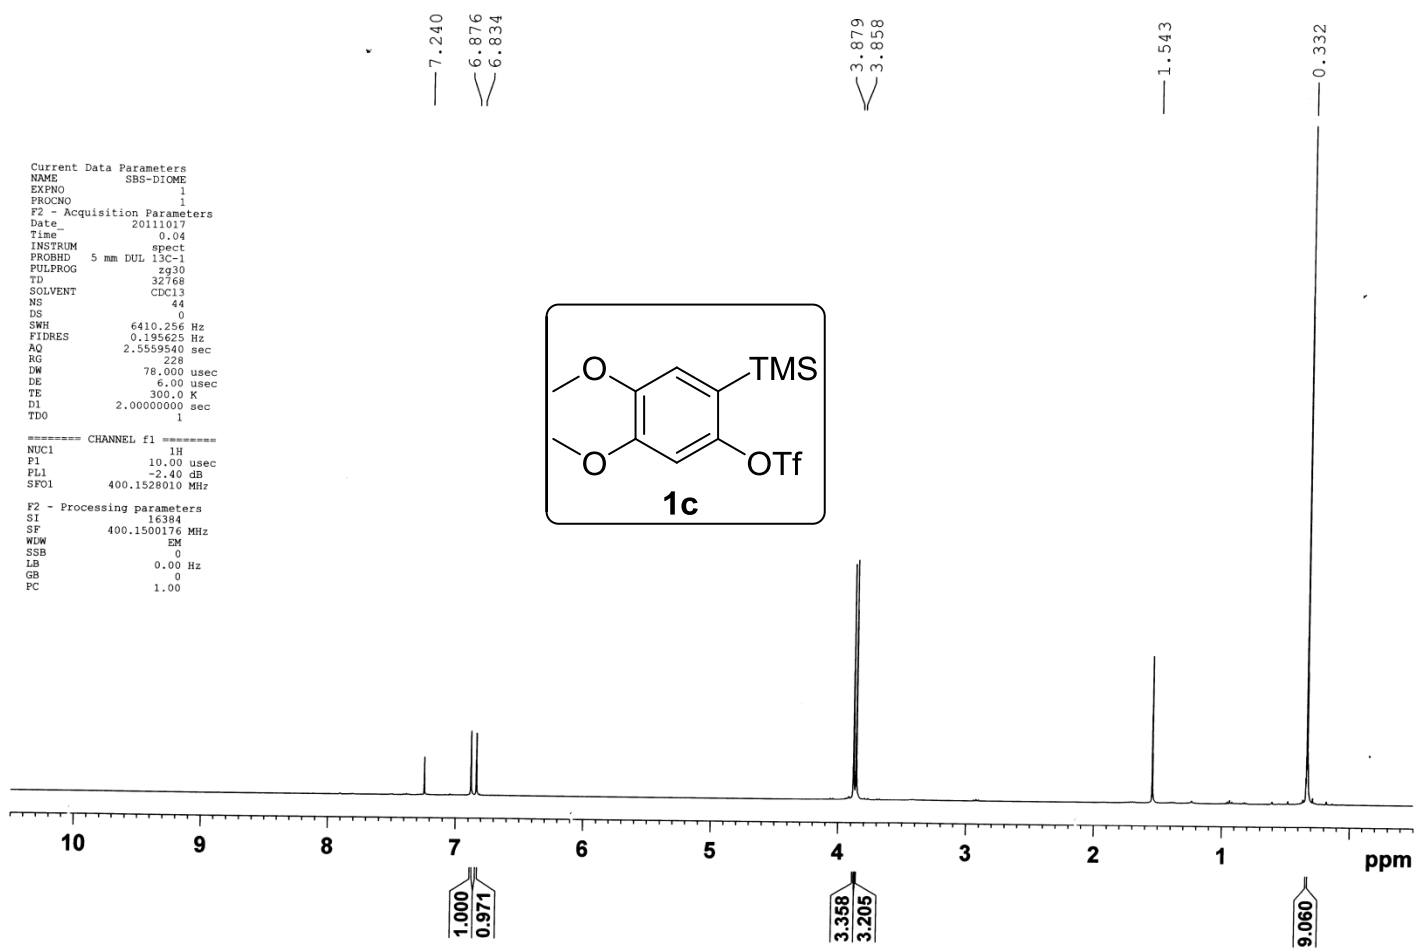

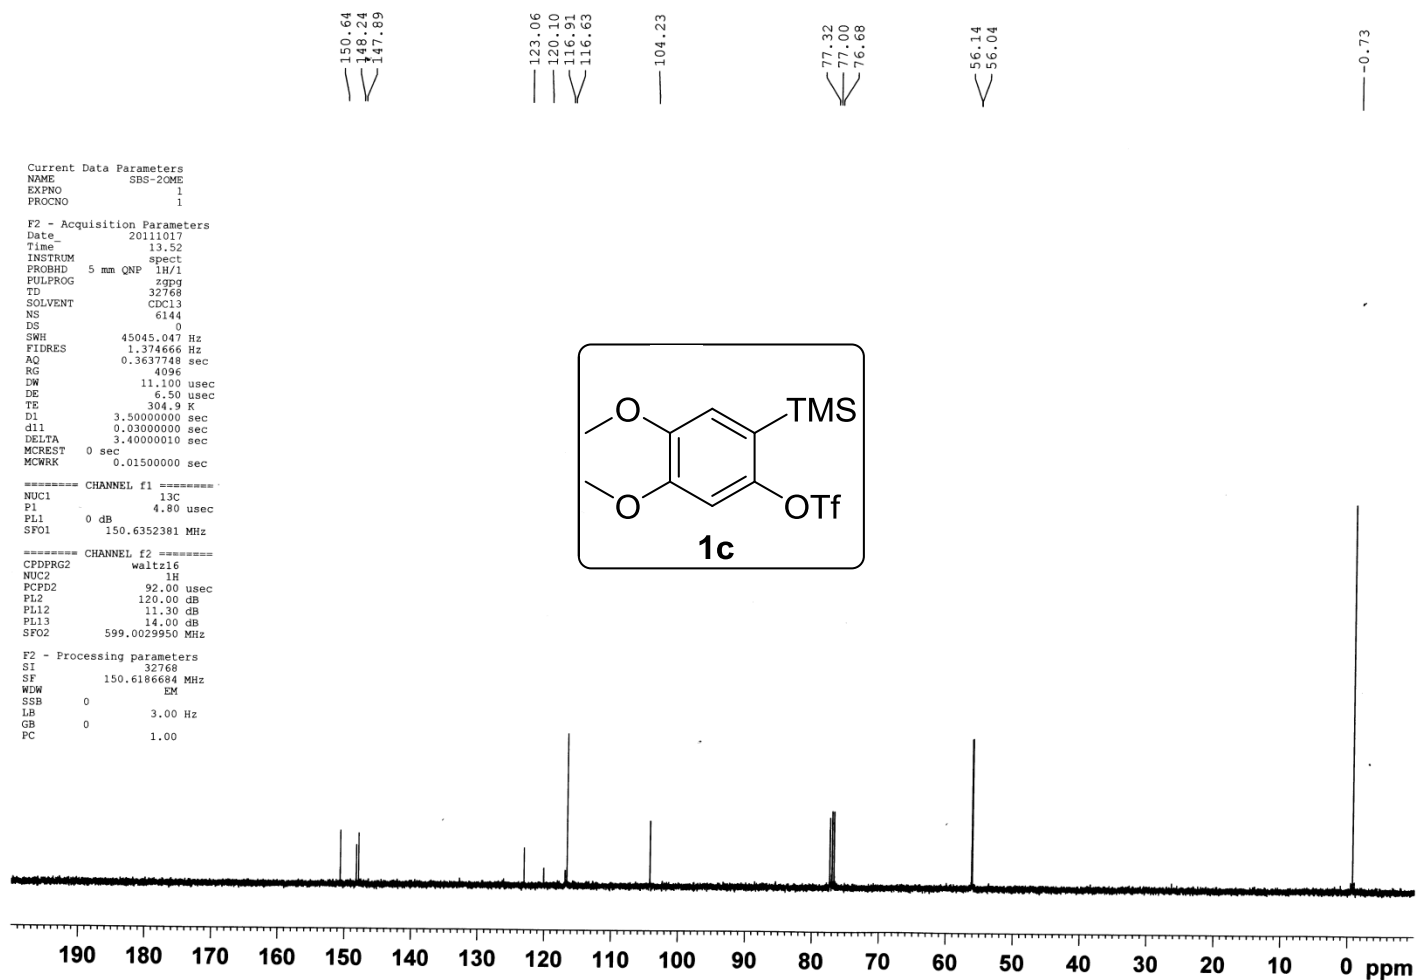

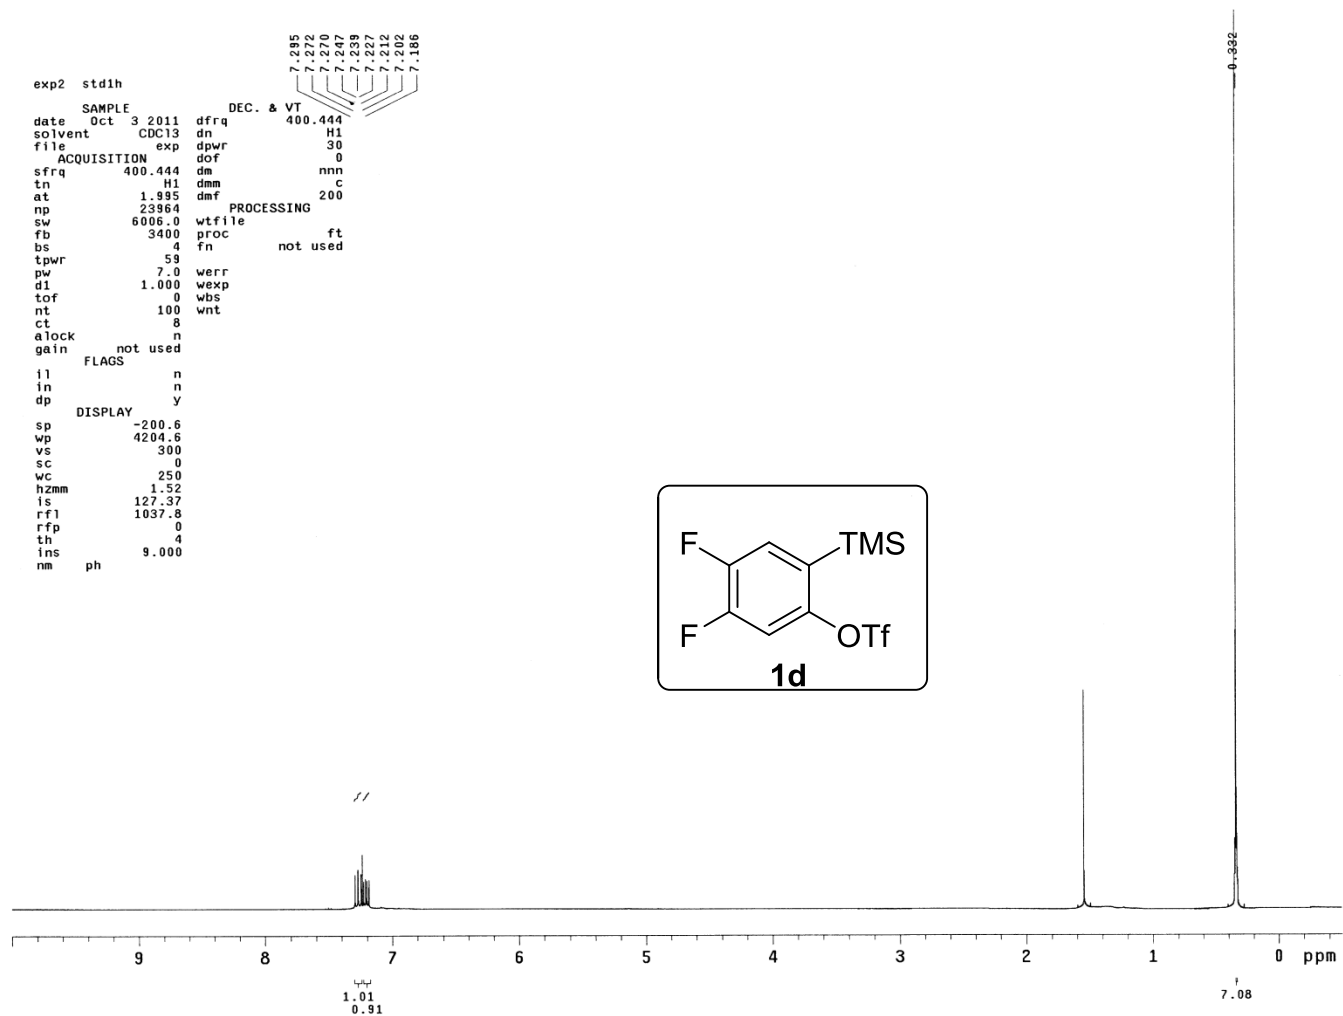

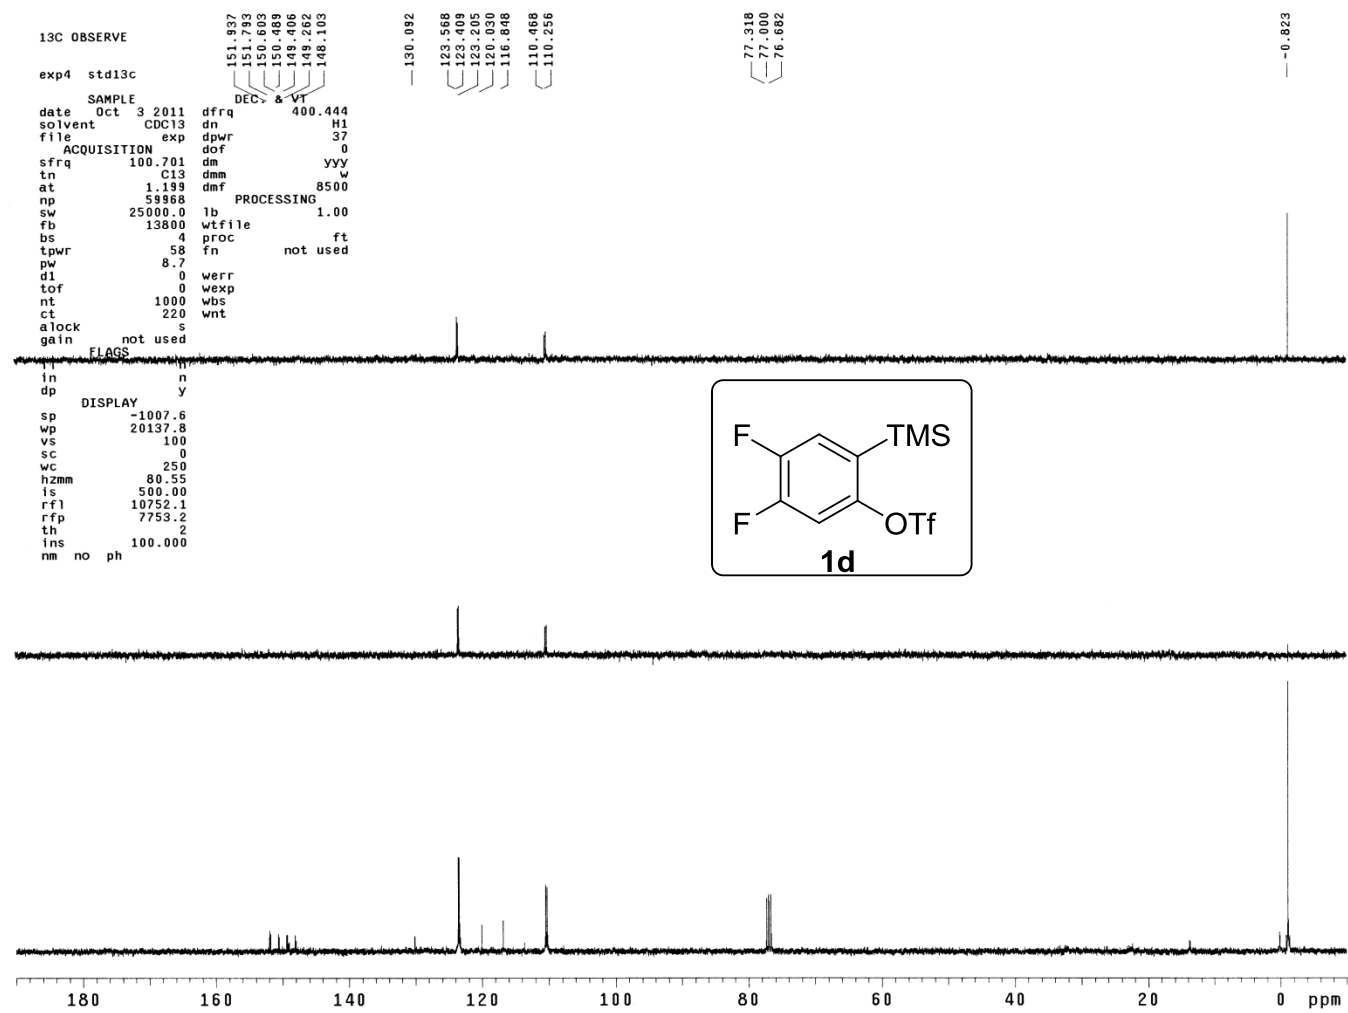



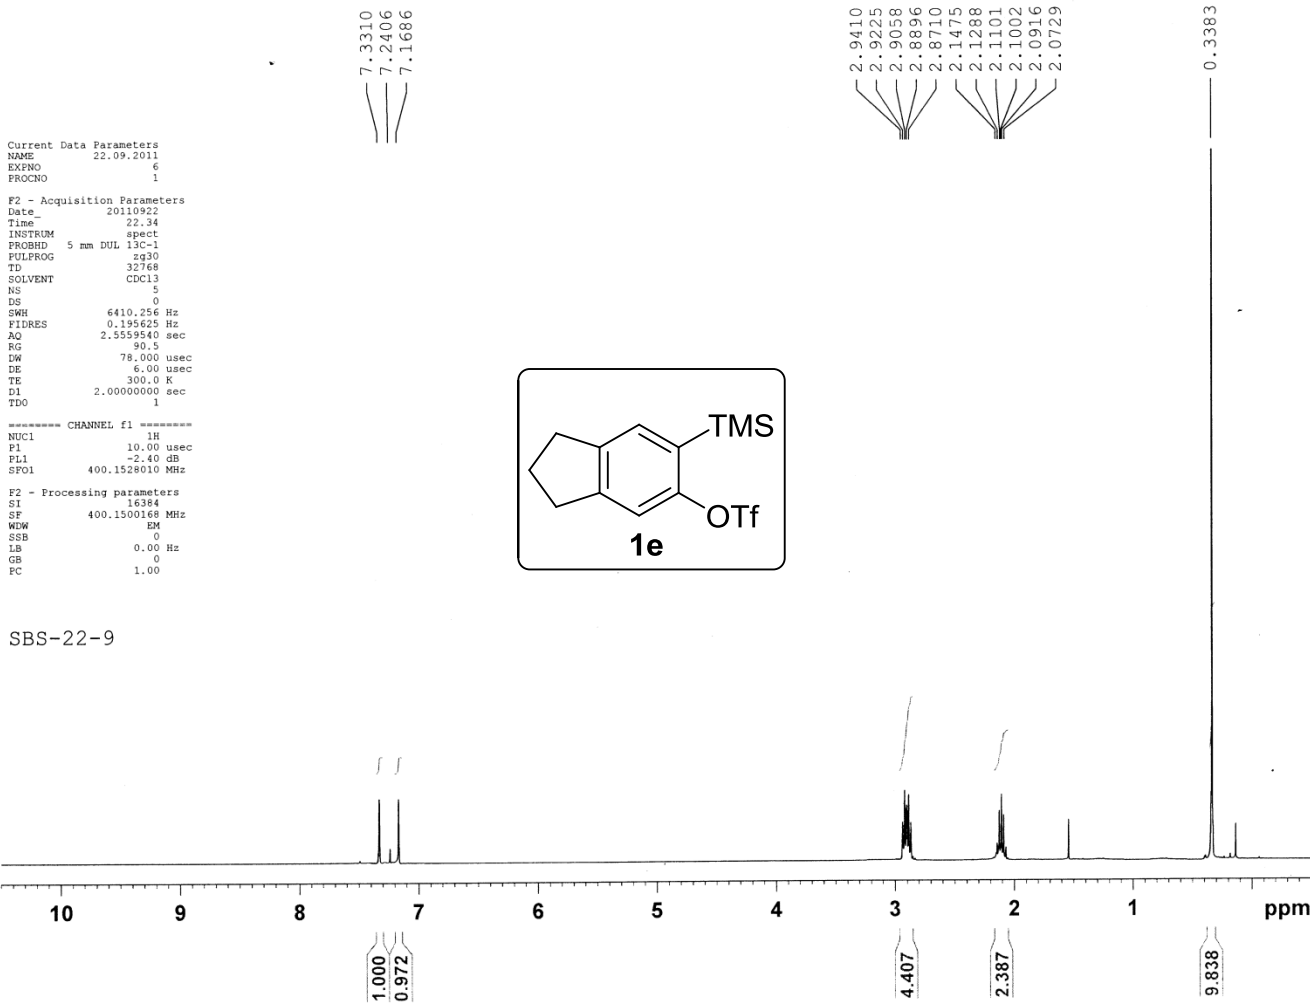

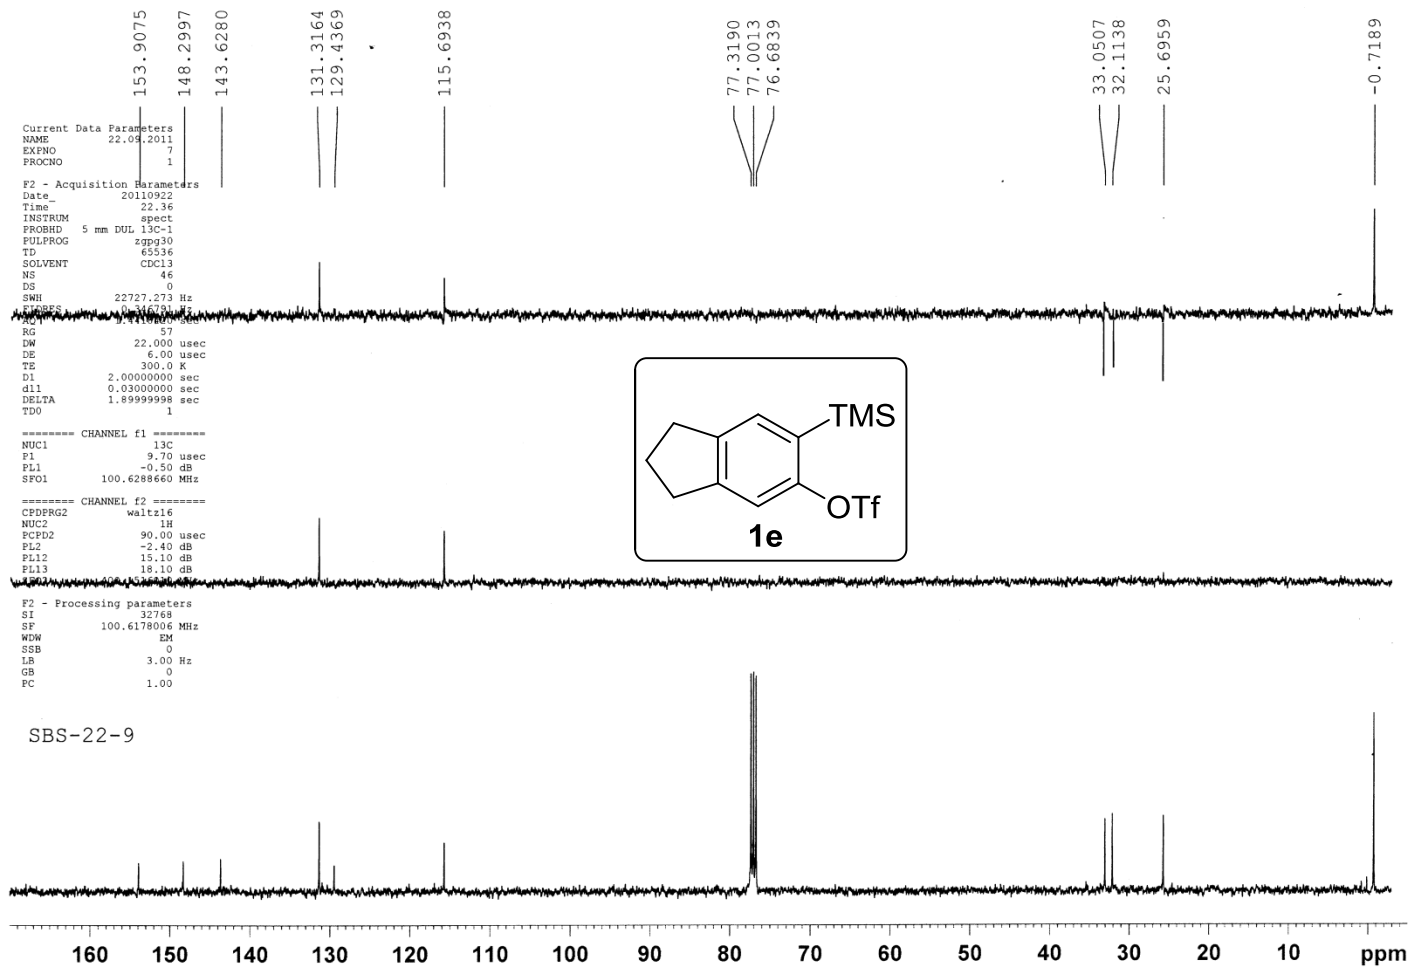

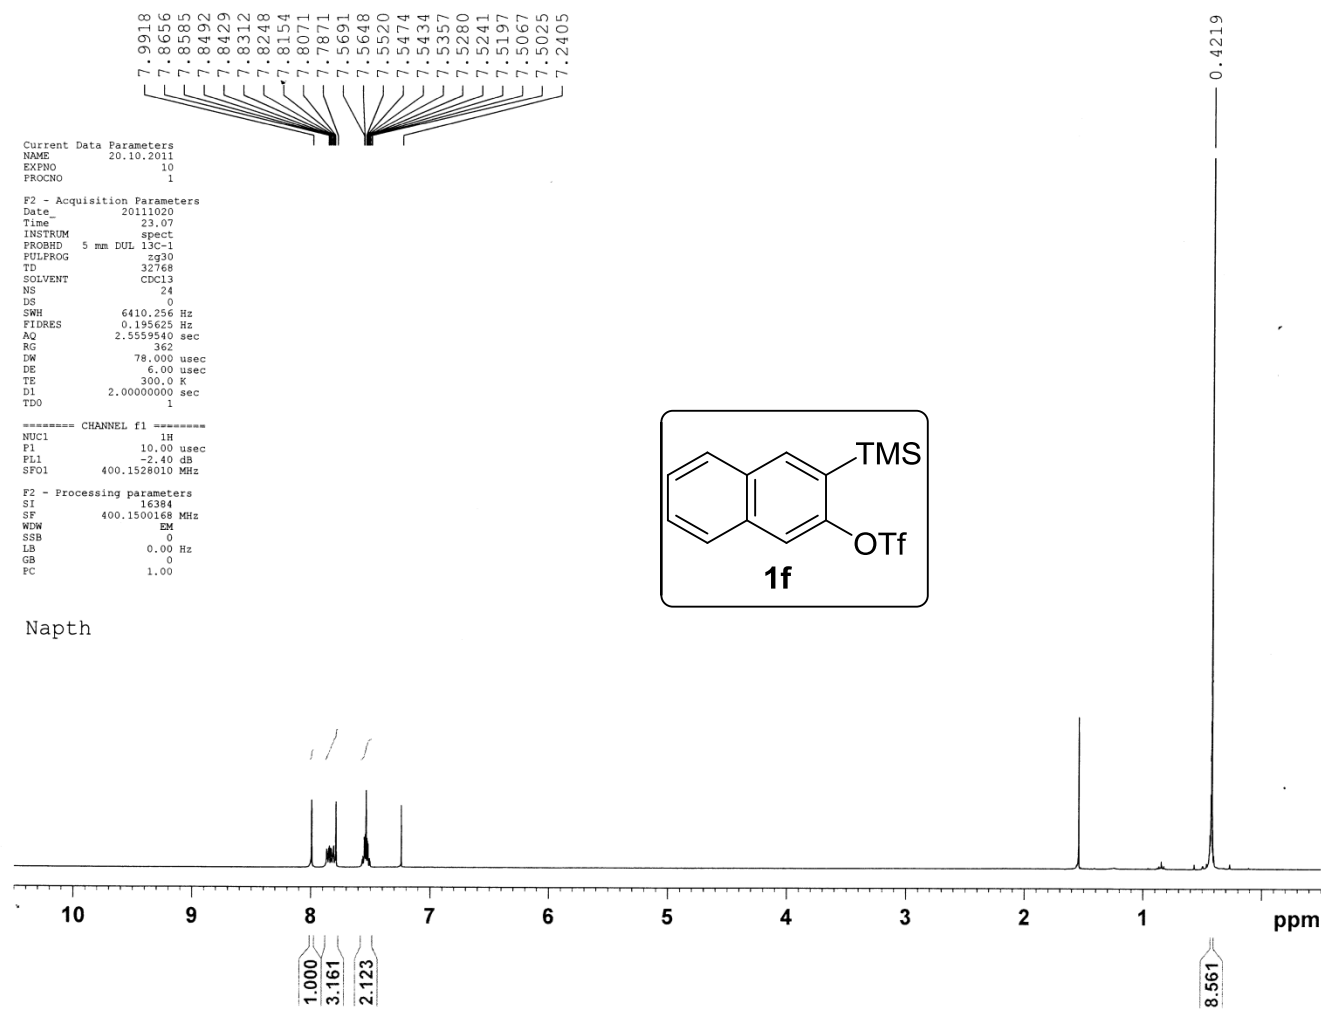

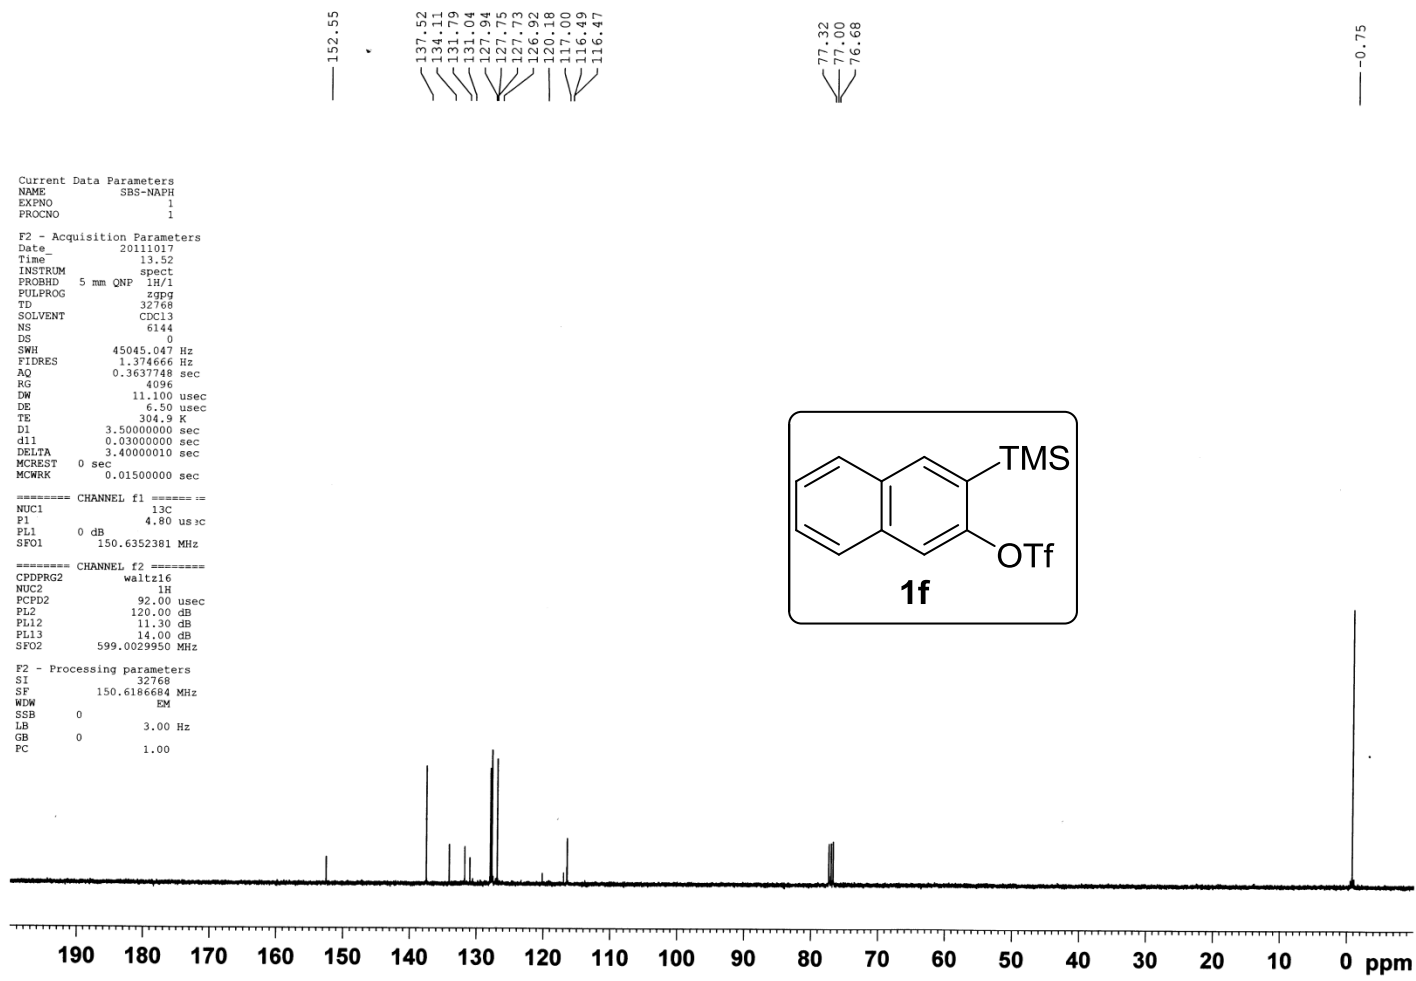

Current Data Parameters  
NAME SBS-30  
EXPNO 1  
PROCNO 1

F2 - Acquisition Parameters  
Date\_ 20110719  
Time 15.25  
INSTRUM spect  
PROBHD 5 mm QNP 1H/1  
PULPROG zg  
TD 32768  
SOLVENT CHCl3  
NS 16  
DS 0  
SWH 8389.262 Hz  
FIDRES 0.256020 Hz  
AQ 1.9530228 sec  
RG 256  
DM 59.600 usec  
DE 6.50 usec  
TE 300.0 K  
D1 1.50000000 sec  
MCKEST 0.00000000 sec  
MCNKK 0.01500000 sec

\*\*\*\*\* CHANNEL f1 \*\*\*\*\*  
NUC1 1H  
P1 10.50 usec  
PL1 0.00 dB  
SFO1 599.0029950 MHz

F2 - Processing parameters  
SI 32768  
SF 599.0000041 MHz  
WDW no  
SSB 0  
LB 0.00 Hz  
GB 0  
PC 1.00

1D NMR plot parameters  
CX 20.00 cm  
CY 6.00 cm  
F1P 10.000 ppm  
F1 5996.00 Hz  
F2P -0.500 ppm  
F2 -299.50 Hz  
PPHMC 0.52500 ppm/cm  
HDCM 314.47501 Hz/cm

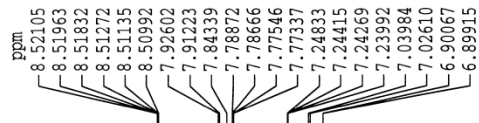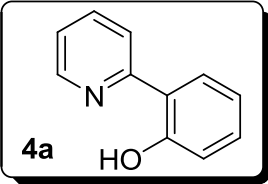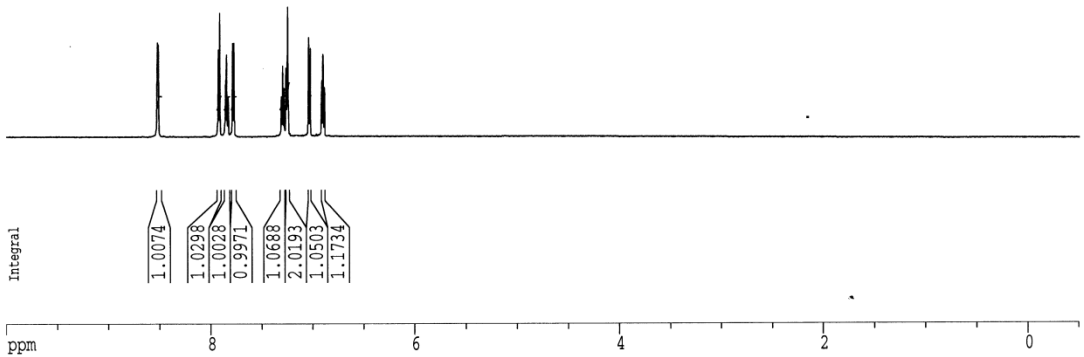

Current Data Parameters  
NAME SBS-30  
EXPNO 2  
PROCNO 1

F2 - Acquisition Parameters  
Date\_ 20110730  
Time 15.26  
INSTRUM spect  
PROBHD 5 mm QNP 1H/1  
PULPROG zgpg  
TD 32768  
SOLVENT CD2Cl2  
NS 2048  
DS 0  
SWH 45045.047 Hz  
FIDRES 1.374666 Hz  
AQ 0.3637748 sec  
RG 2048  
DN 11.100 usec  
DE 6.50 usec  
TE 304.0 K  
D1 3.50000000 sec  
d11 0.03000000 sec  
DELTA 3.40000010 sec  
MCREST 0.00000000 sec  
MCNRK 0.01500000 sec

===== CHANNEL f1 =====  
NUC1 13C  
P1 4.80 usec  
PL1 0.00 dB  
SFO1 150.6352381 MHz

===== CHANNEL f2 =====  
CPDPRG2 waltz16  
NUC2 1H  
PCPD2 92.00 usec  
PL2 120.00 dB  
PL12 9.00 dB  
PL13 14.00 dB  
SFO2 599.0029950 MHz

F2 - Processing parameters  
SI 65536  
SF 150.6186703 MHz  
WDW EM  
SSB 0  
LB 3.00 Hz  
GB 0  
PC 1.00

1D NMR plot parameters  
CX 20.00 cm  
CY 15.00 cm  
F1P 200.000 ppm  
F1 30123.73 Hz  
F2P 0.000 ppm  
F2 0.00 Hz  
PPMCM 10.00000 ppm/cm  
HZCM 1506.18665 Hz/cm

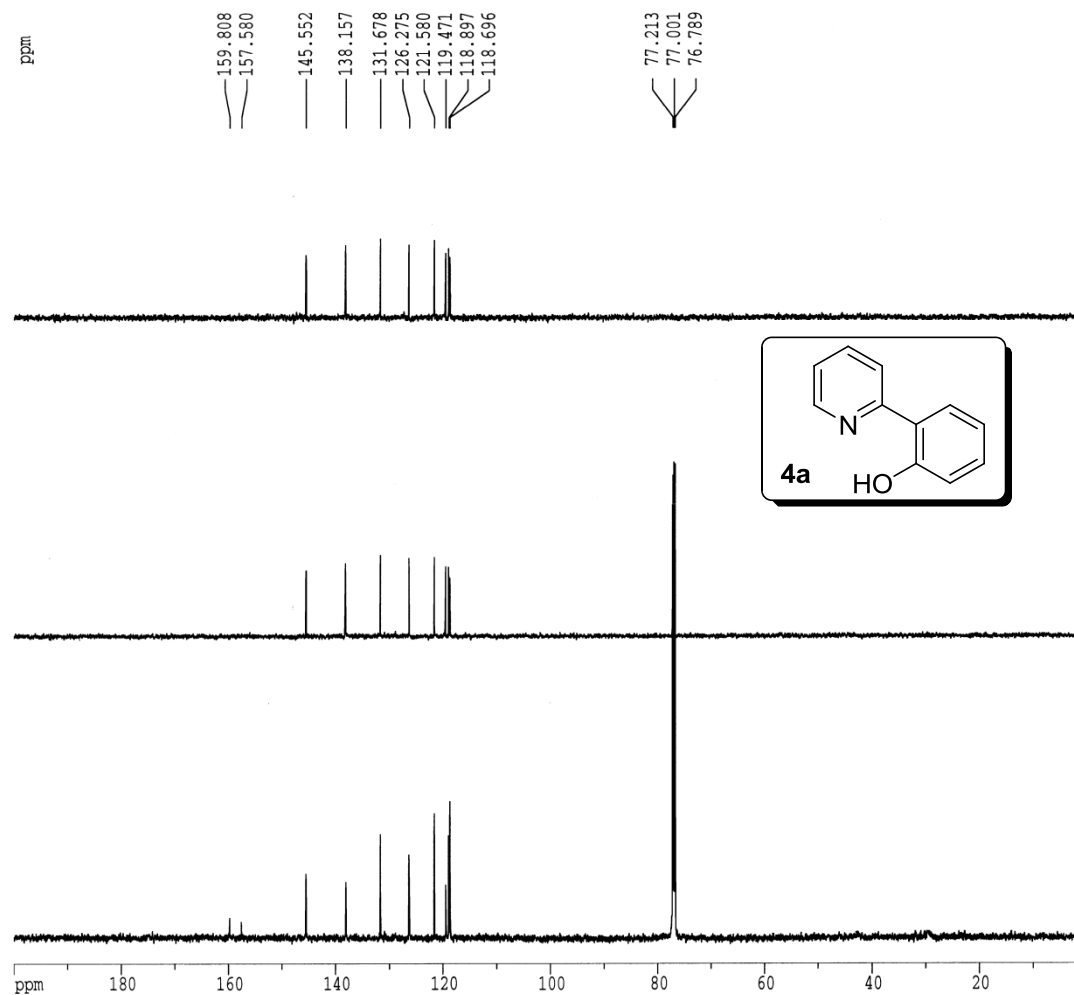

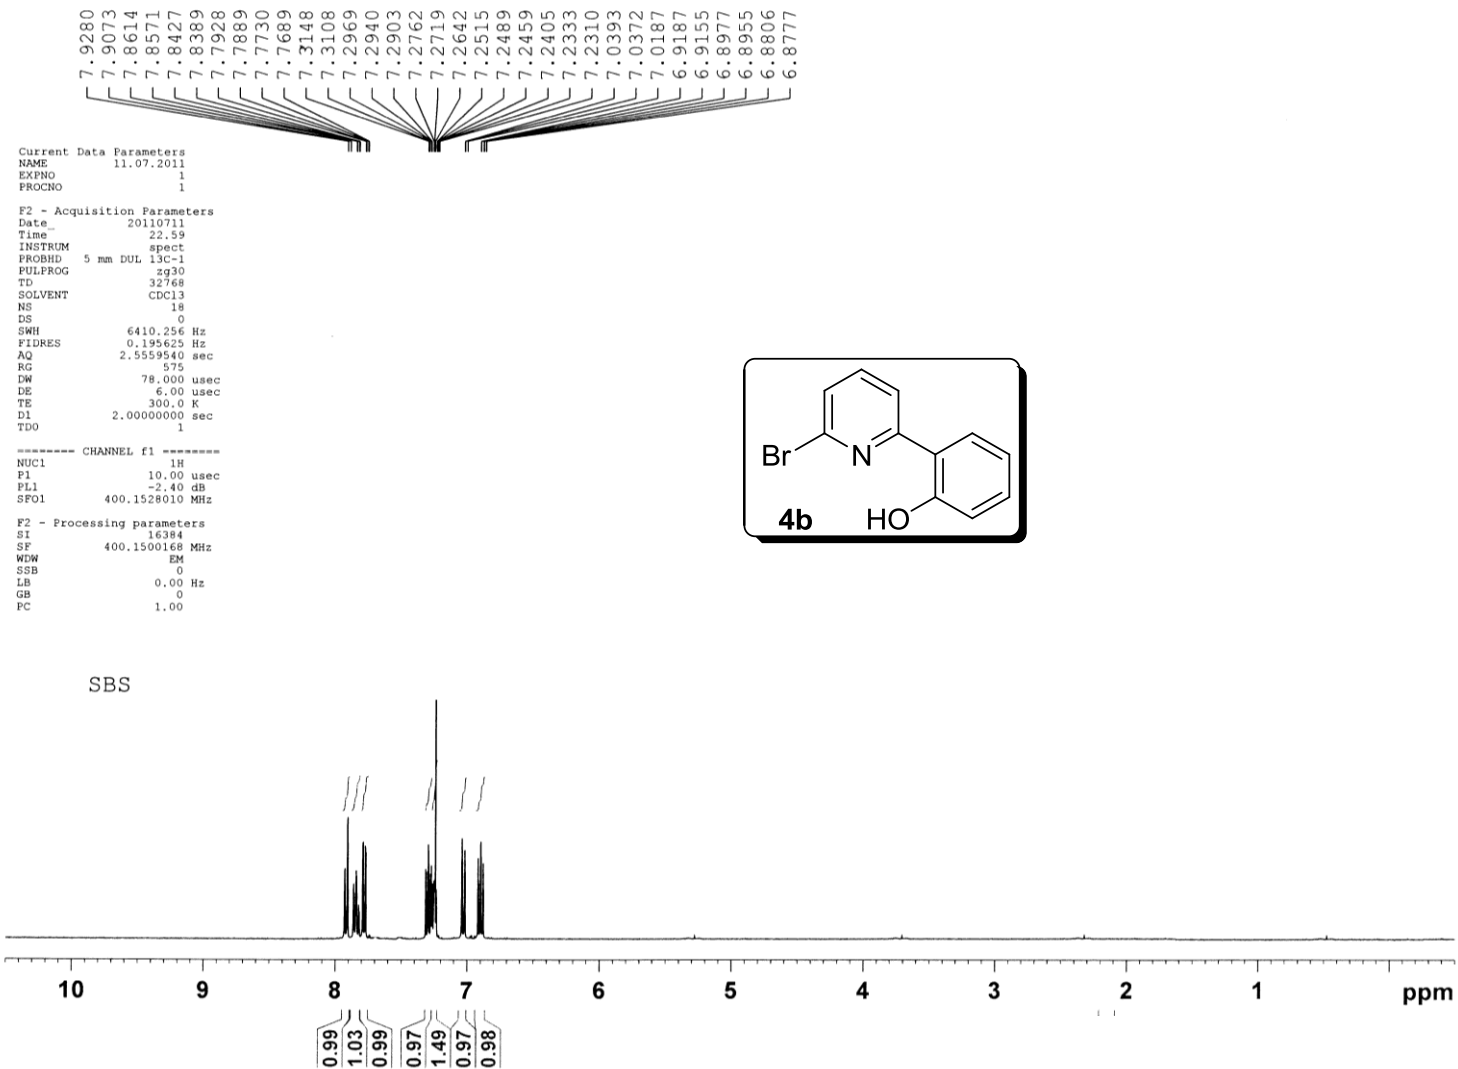

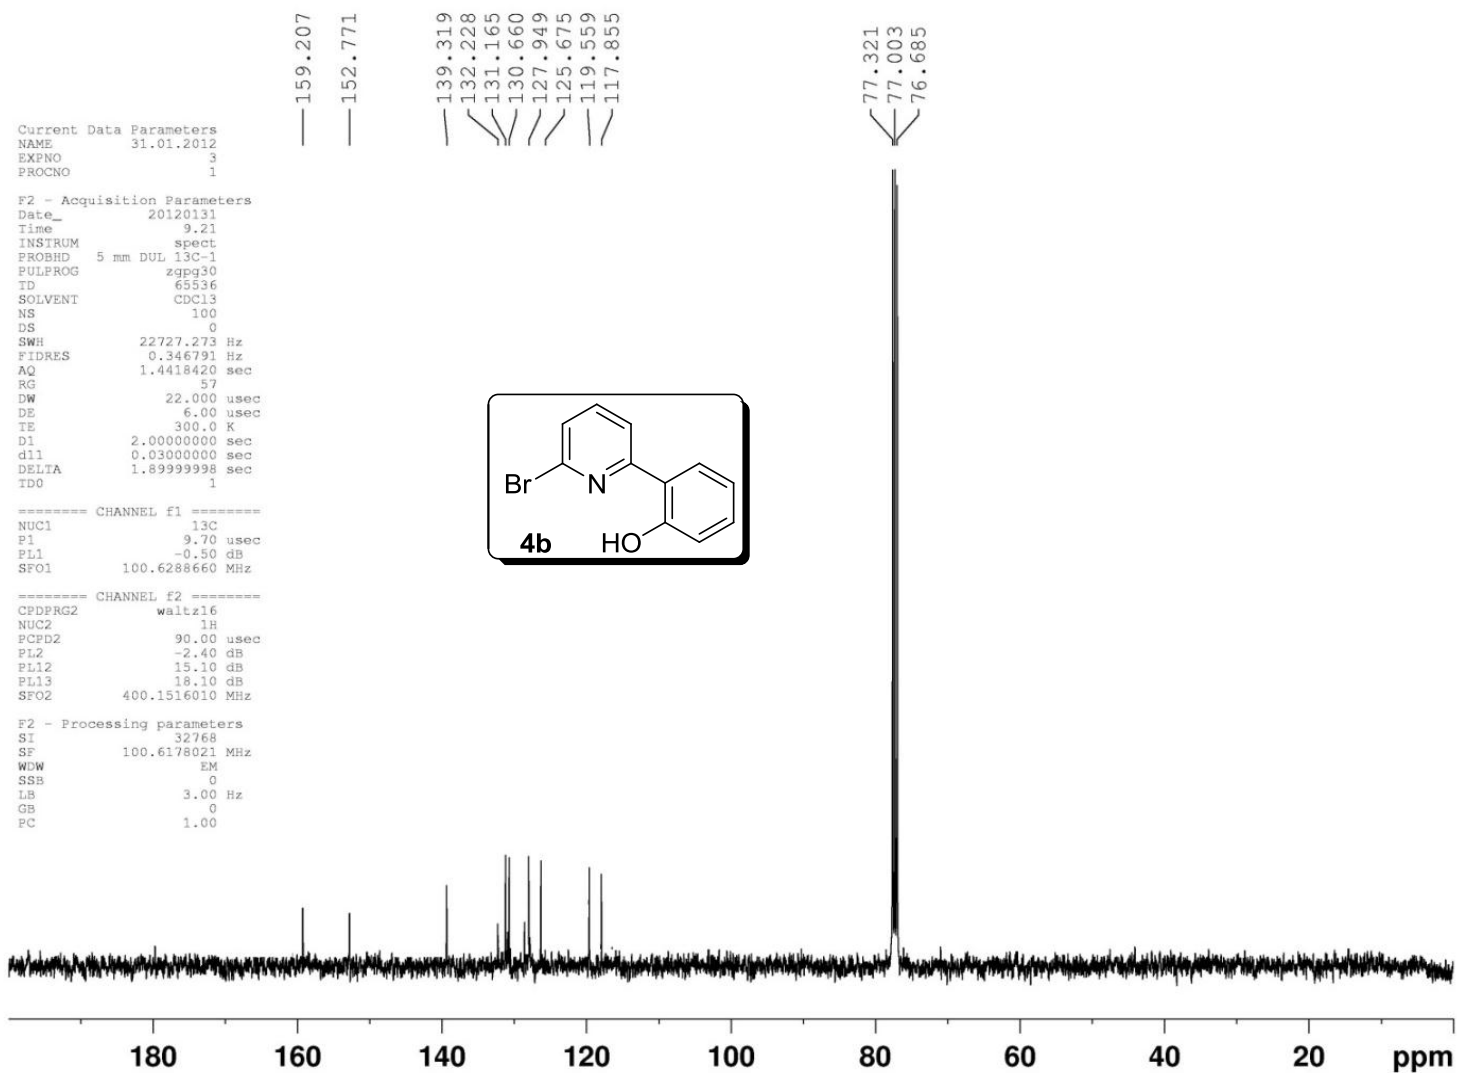



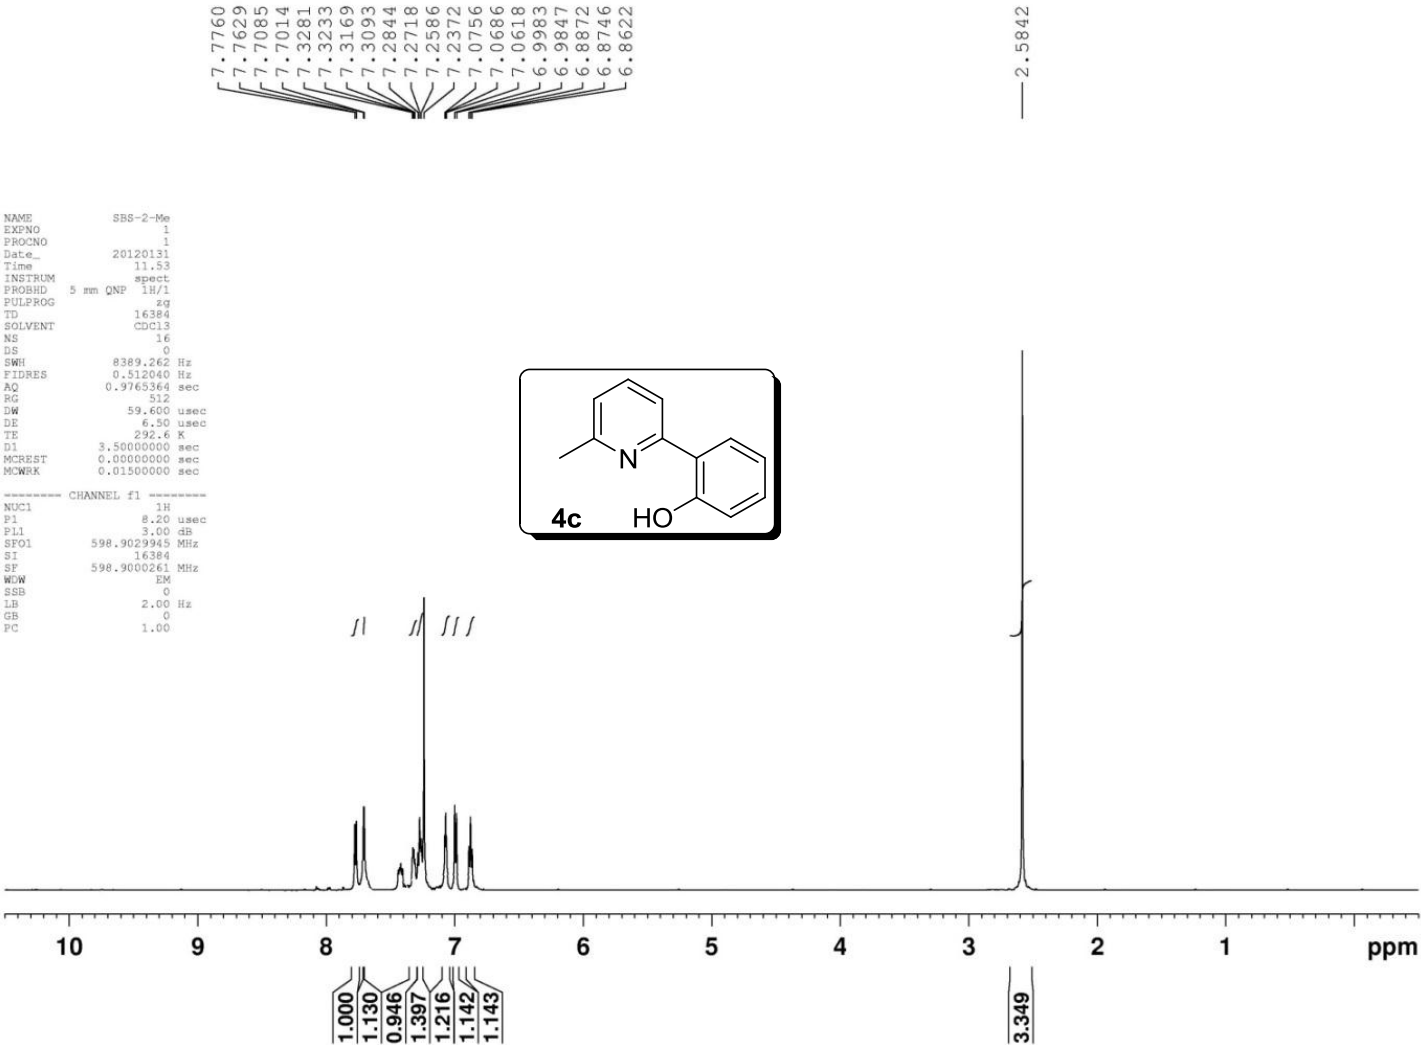

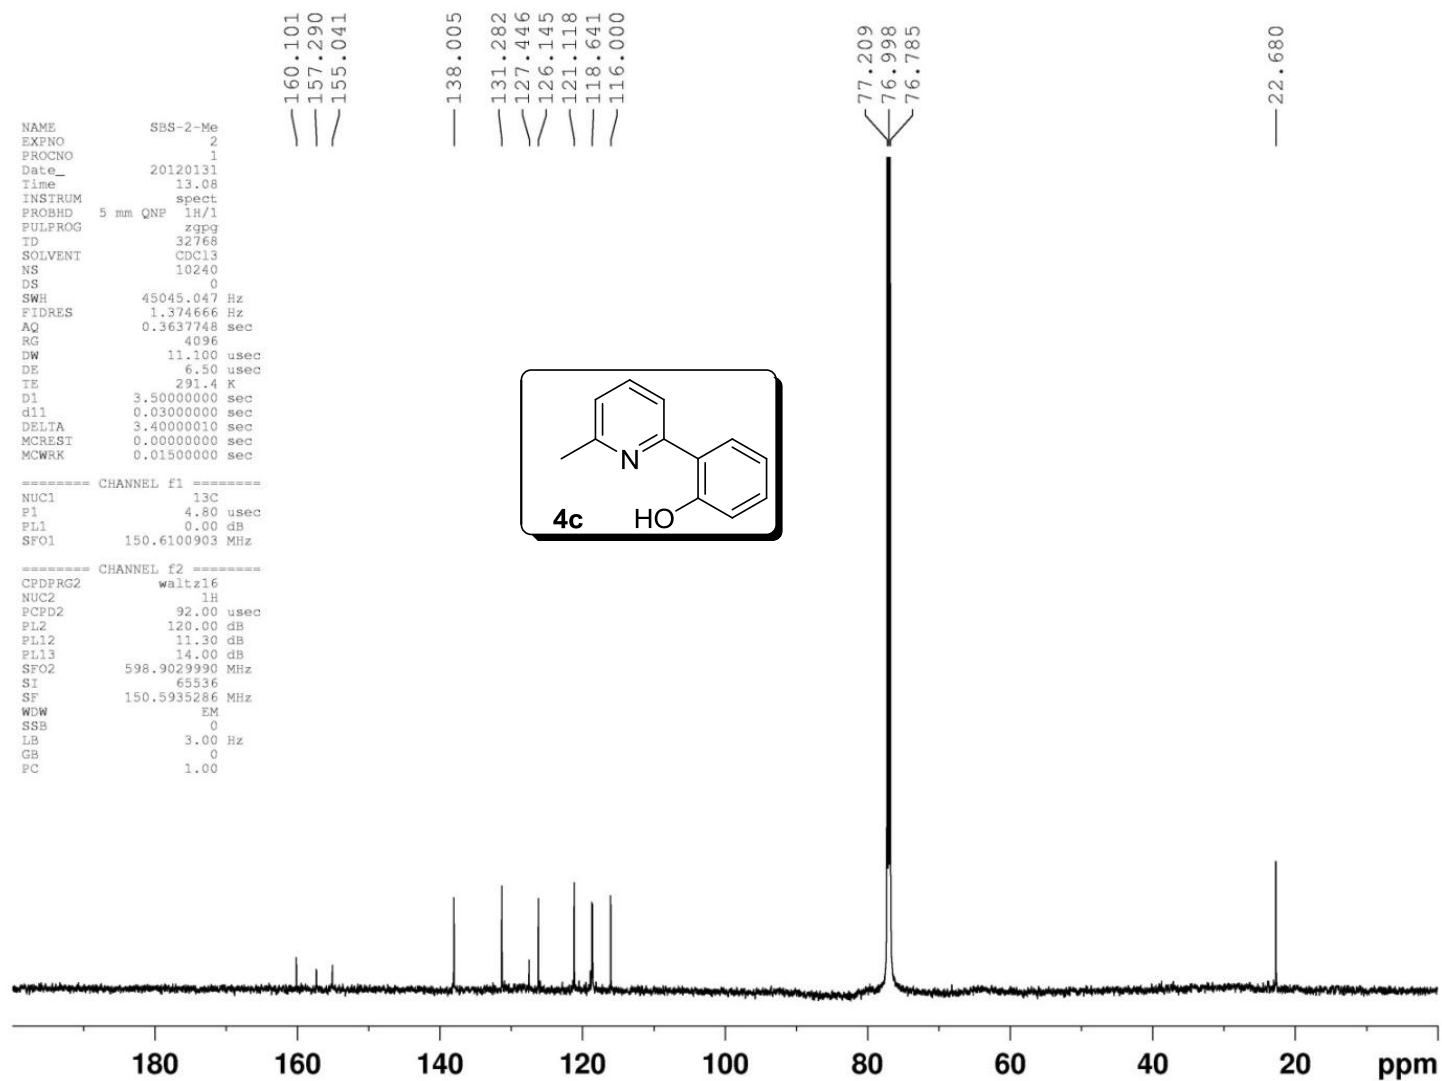

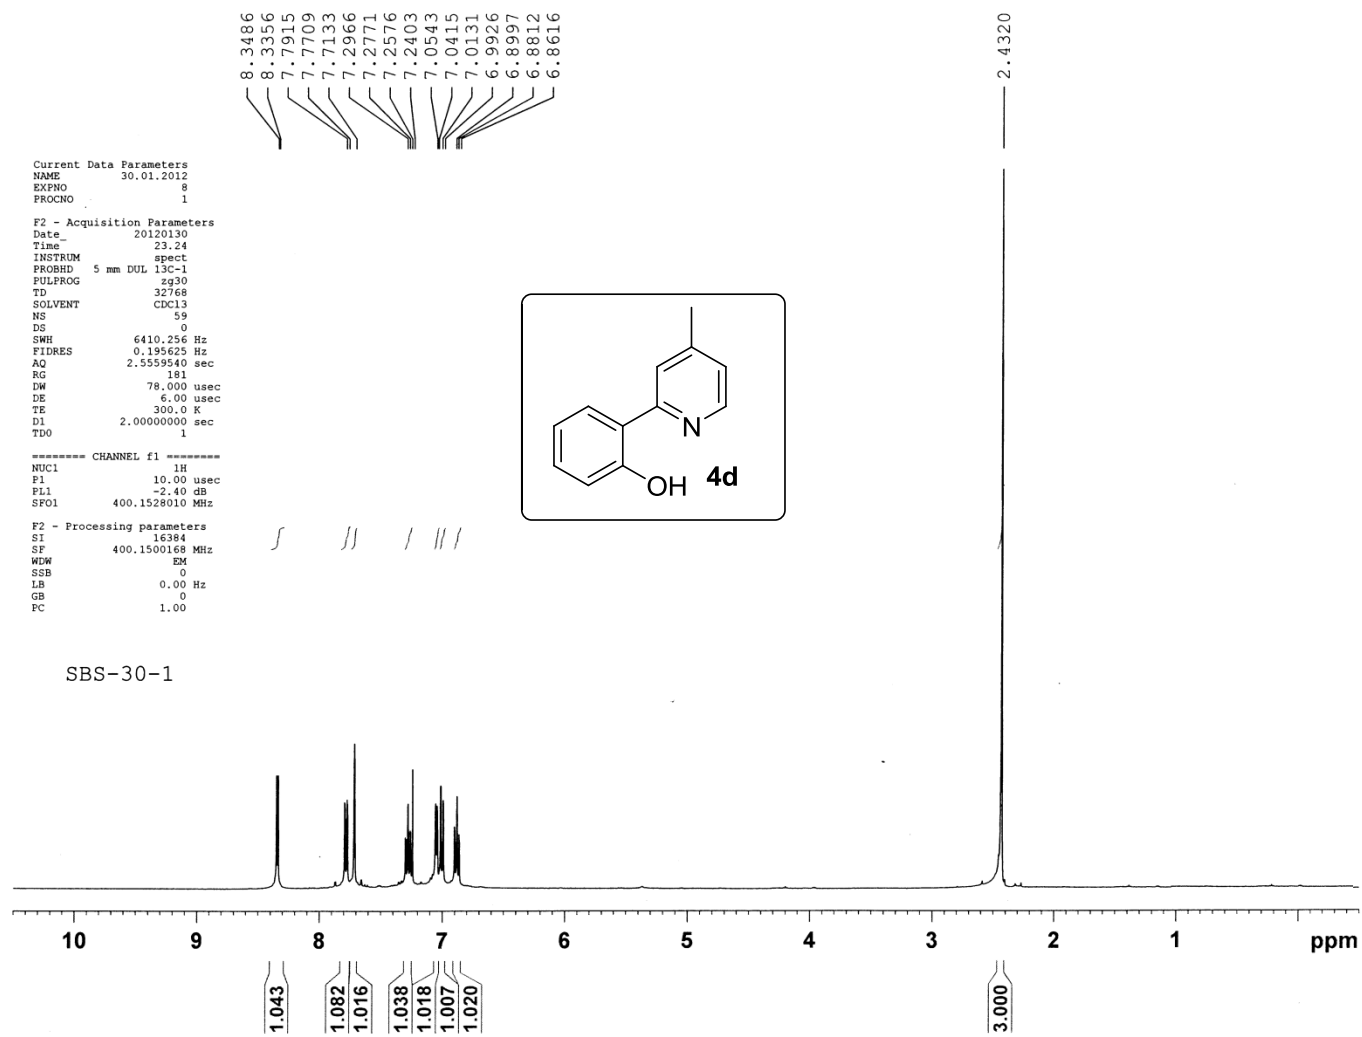

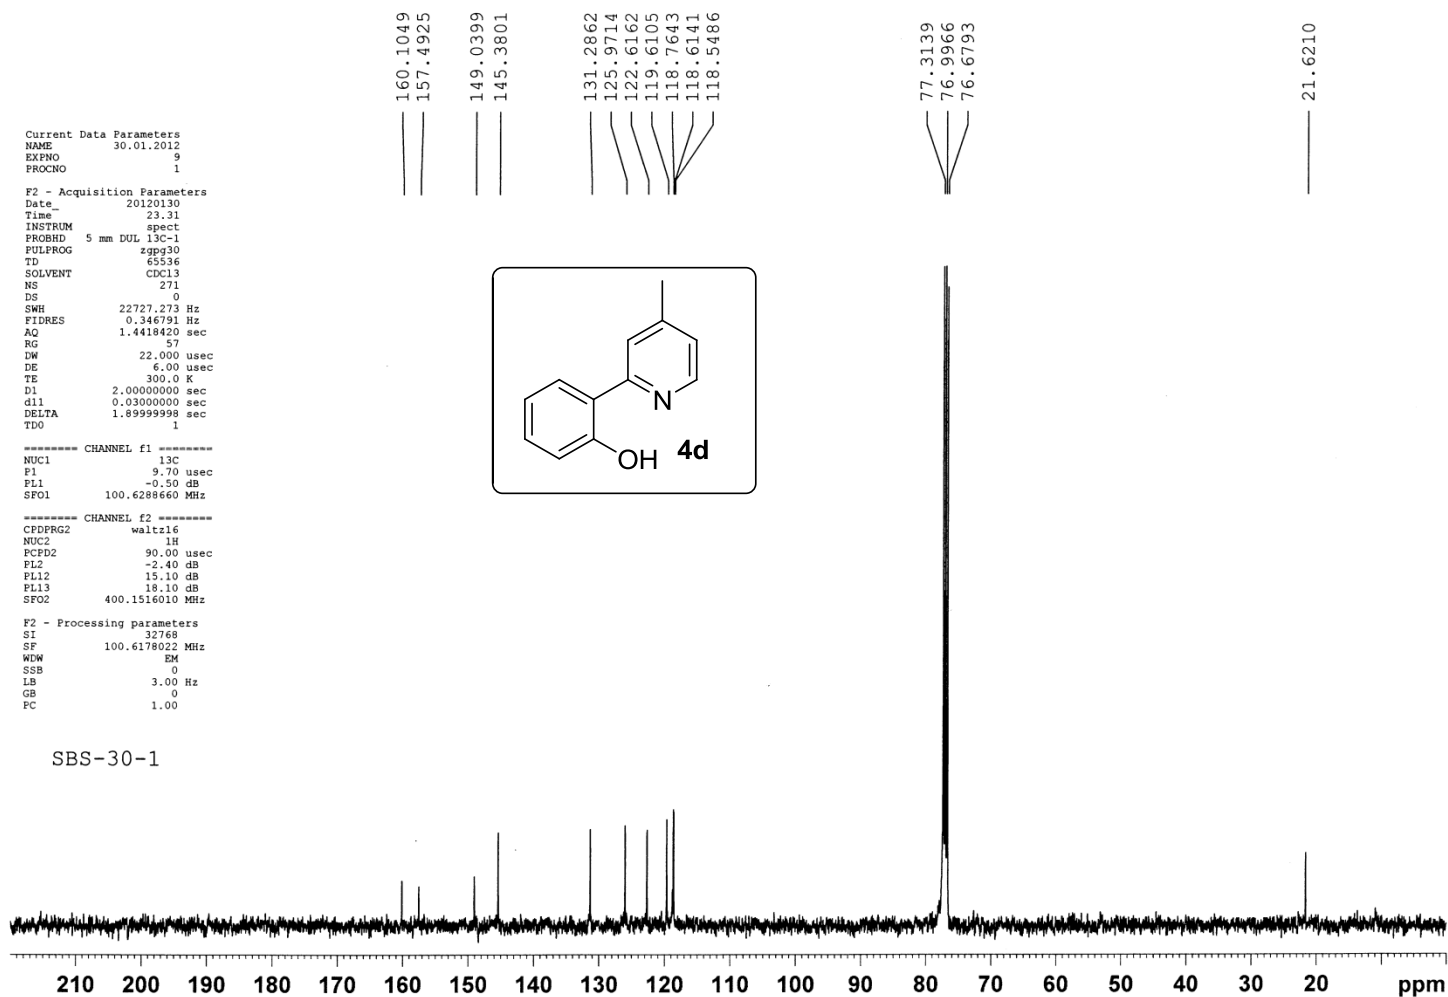

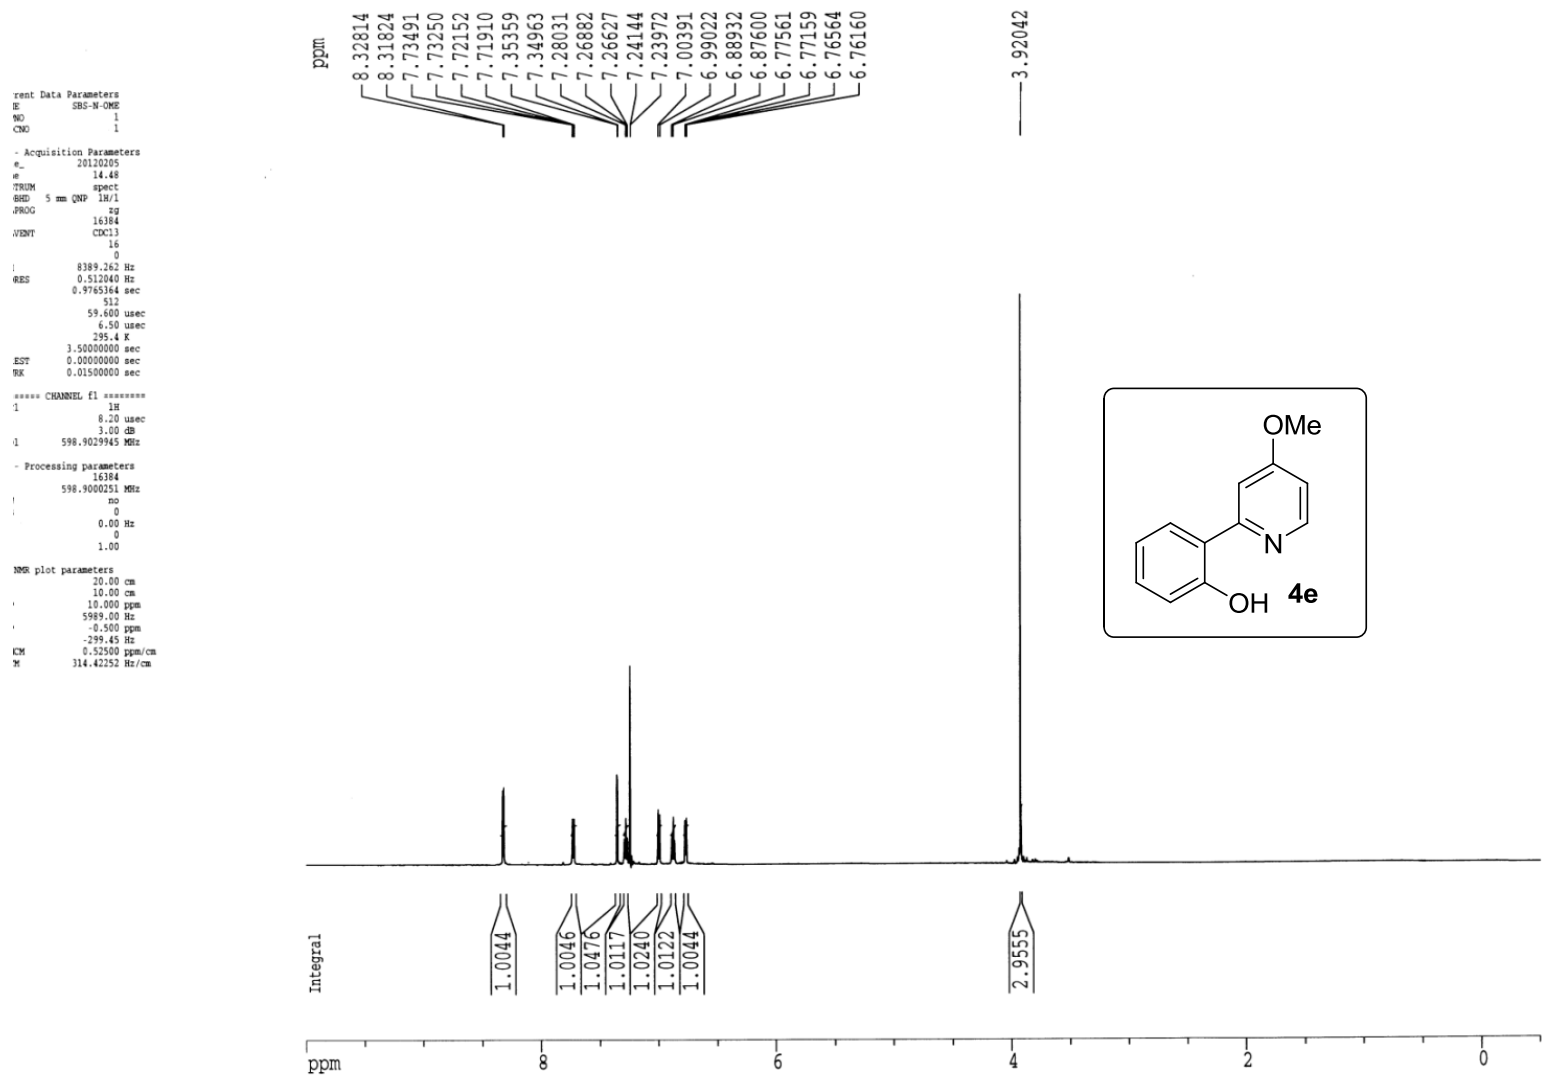

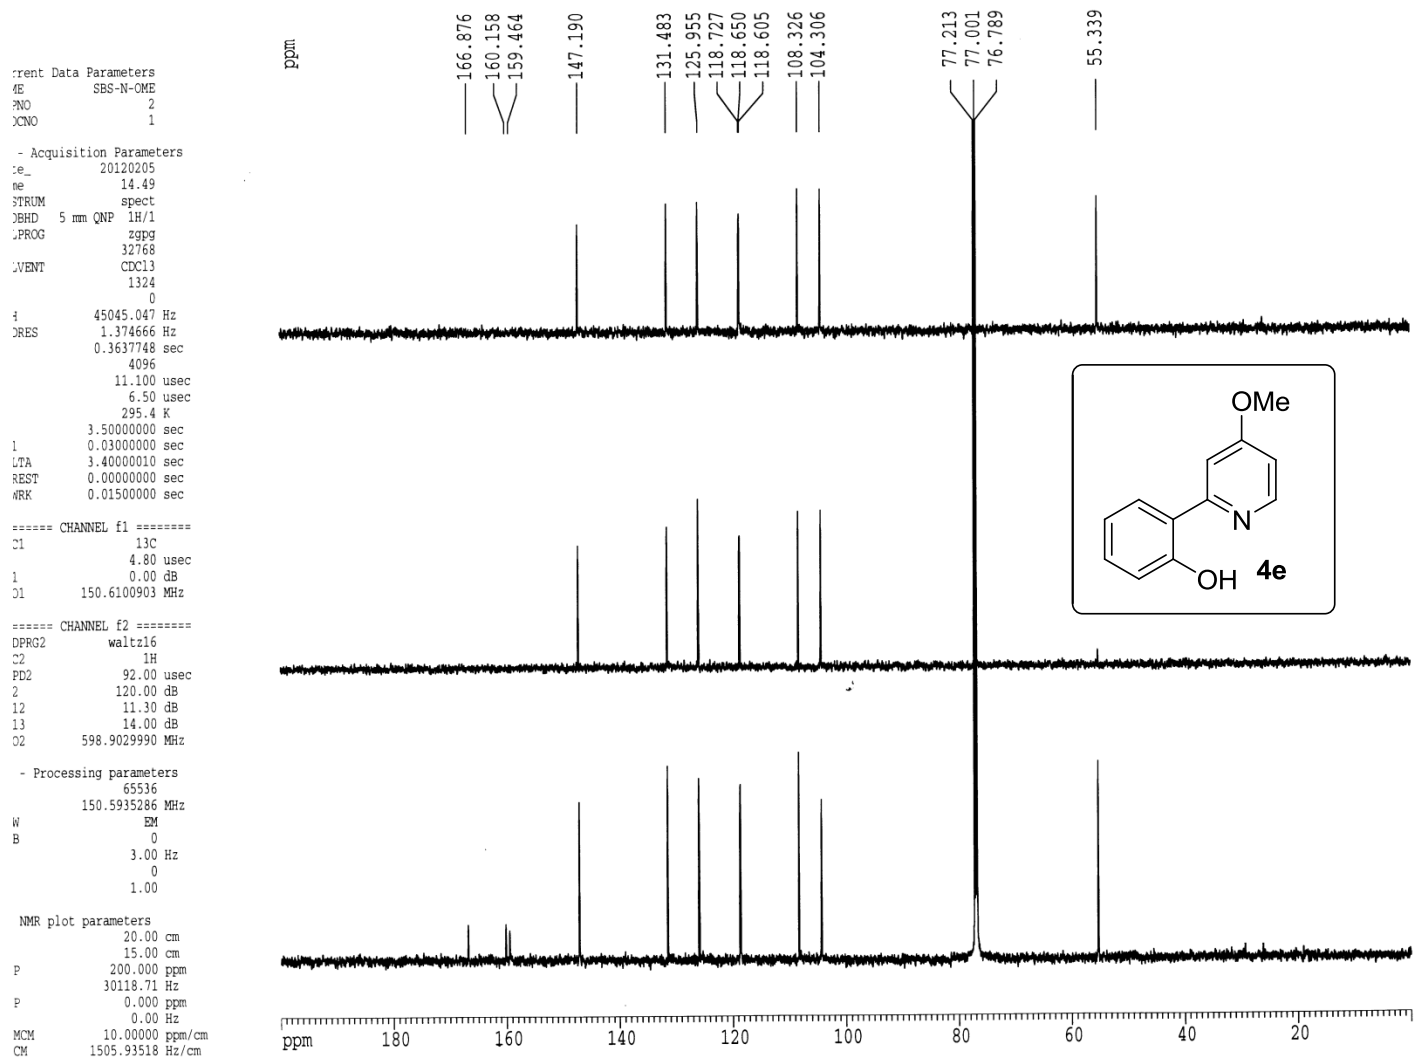

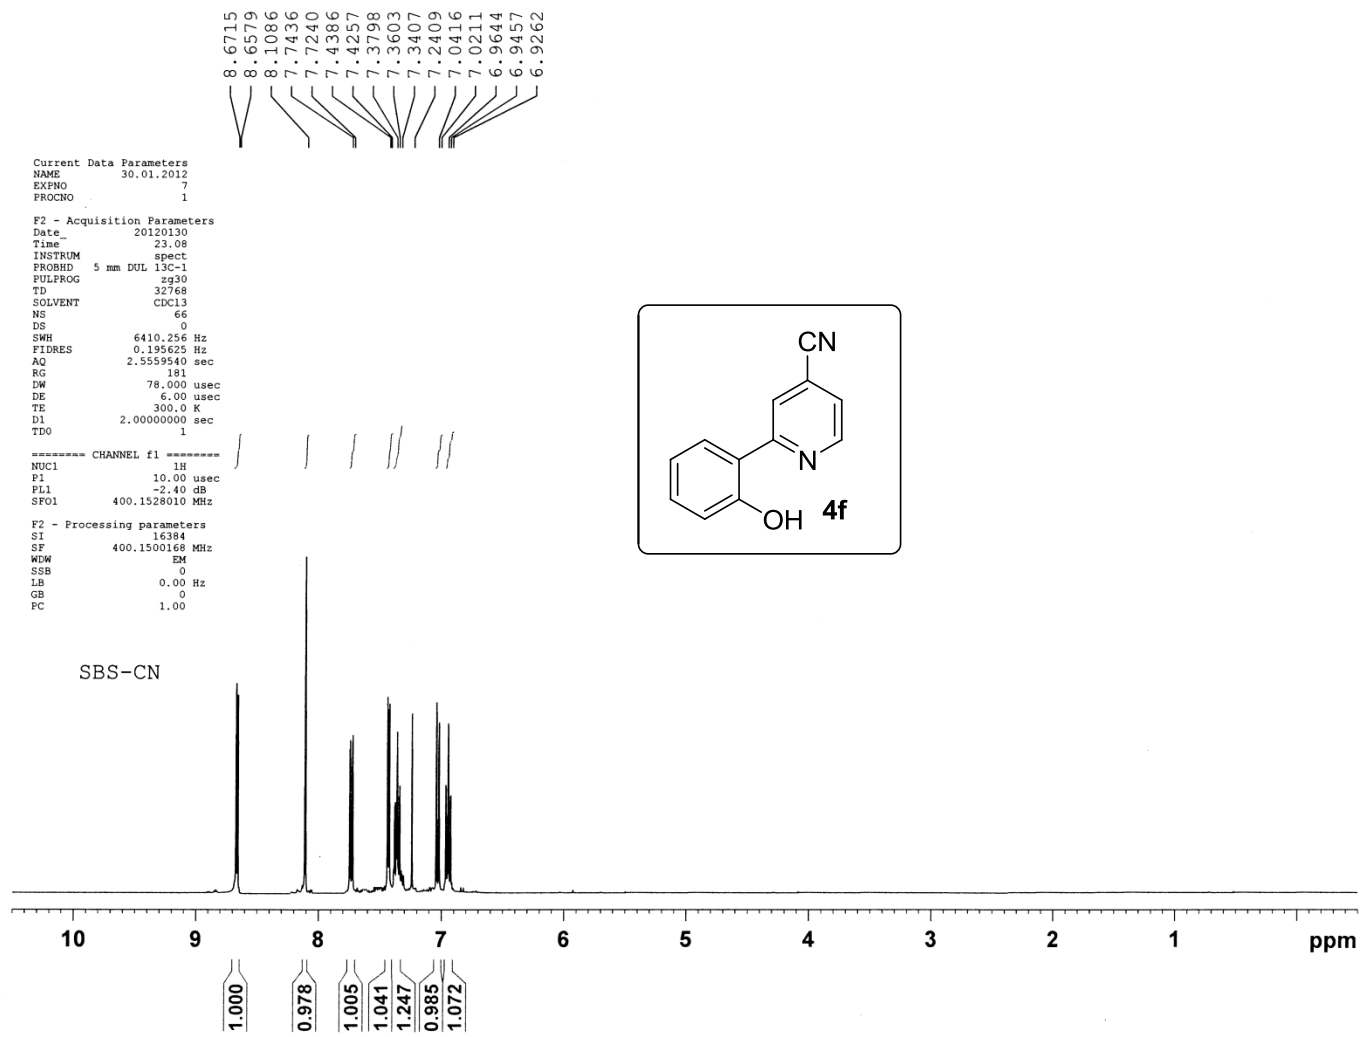

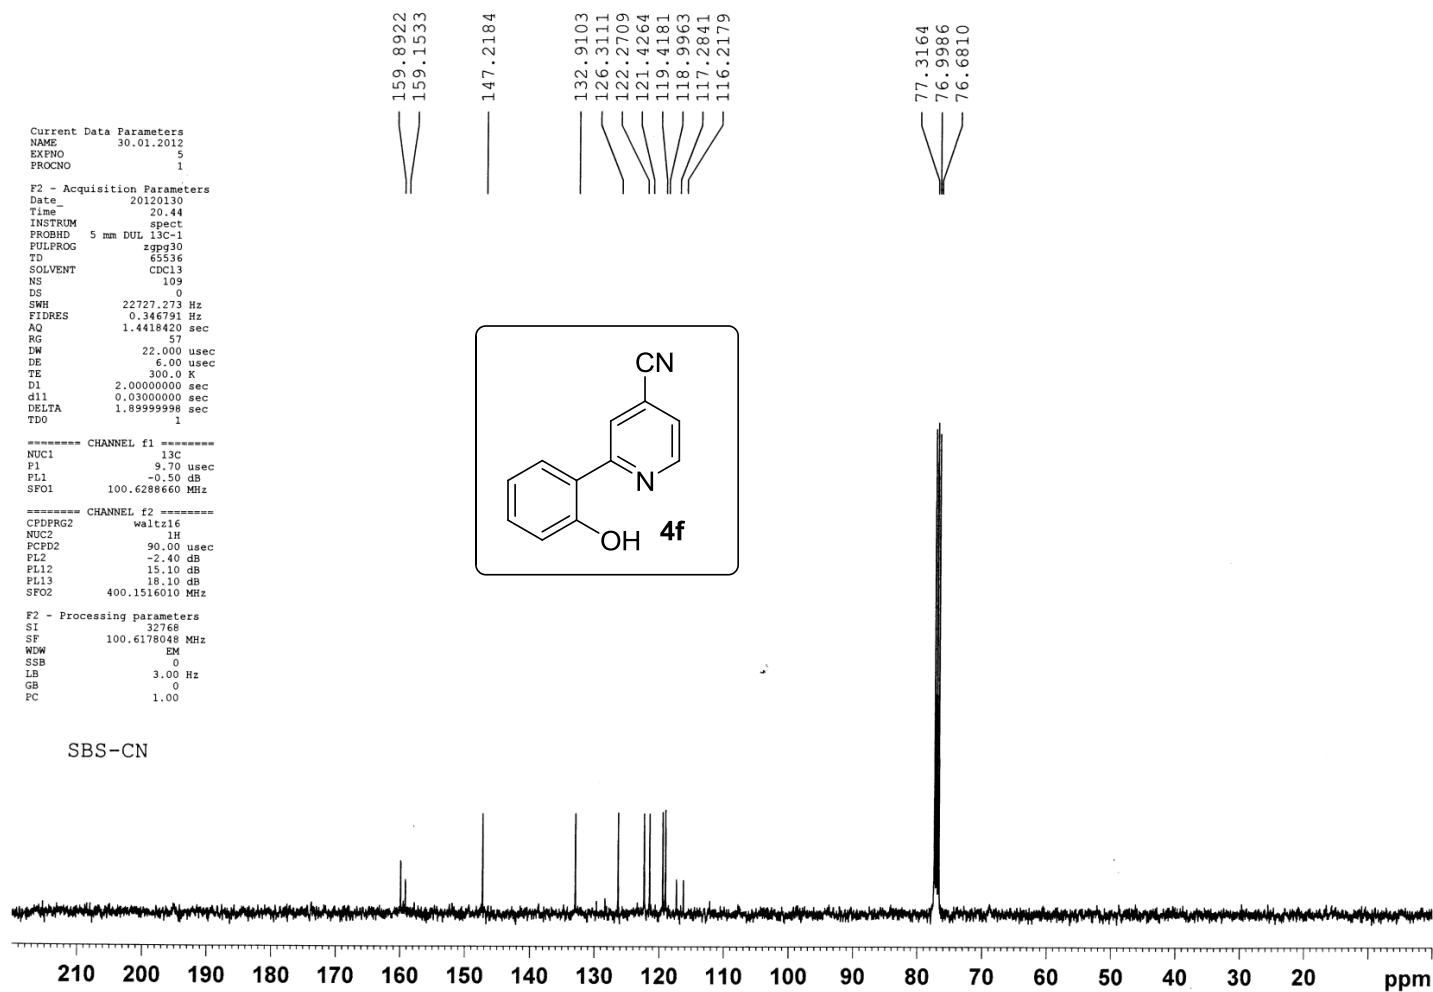



rent Data Parameters  
F 20110714  
NO 1  
CNO 1  
- Acquisition Parameters  
F 20110714  
F 15.52  
INUM spect  
SUD 5 mm QNP 1H/1  
PROG zg  
32768  
VENT CXC11  
14  
0  
9415.385 Hz  
RES 0.291438 Hz  
1.7039860 sec  
84  
52.000 usec  
6.50 usec  
303.2 K  
2.00000000 sec  
EST 0.00000000 sec  
RK 0.01500000 sec  
===== CHANNEL f1 =====  
l 1H  
10.00 usec  
0.00 dB  
l 599.0028113 MHz  
- Processing parameters  
32768  
599.0000265 MHz  
no  
0  
0.00 Hz  
0  
1.00  
90 plot parameters  
20.00 cm  
6.00 cm  
10.000 ppm  
5990.00 Hz  
-0.500 ppm  
-299.50 Hz  
0.53500 ppm/cm  
314.47501 Hz/cm

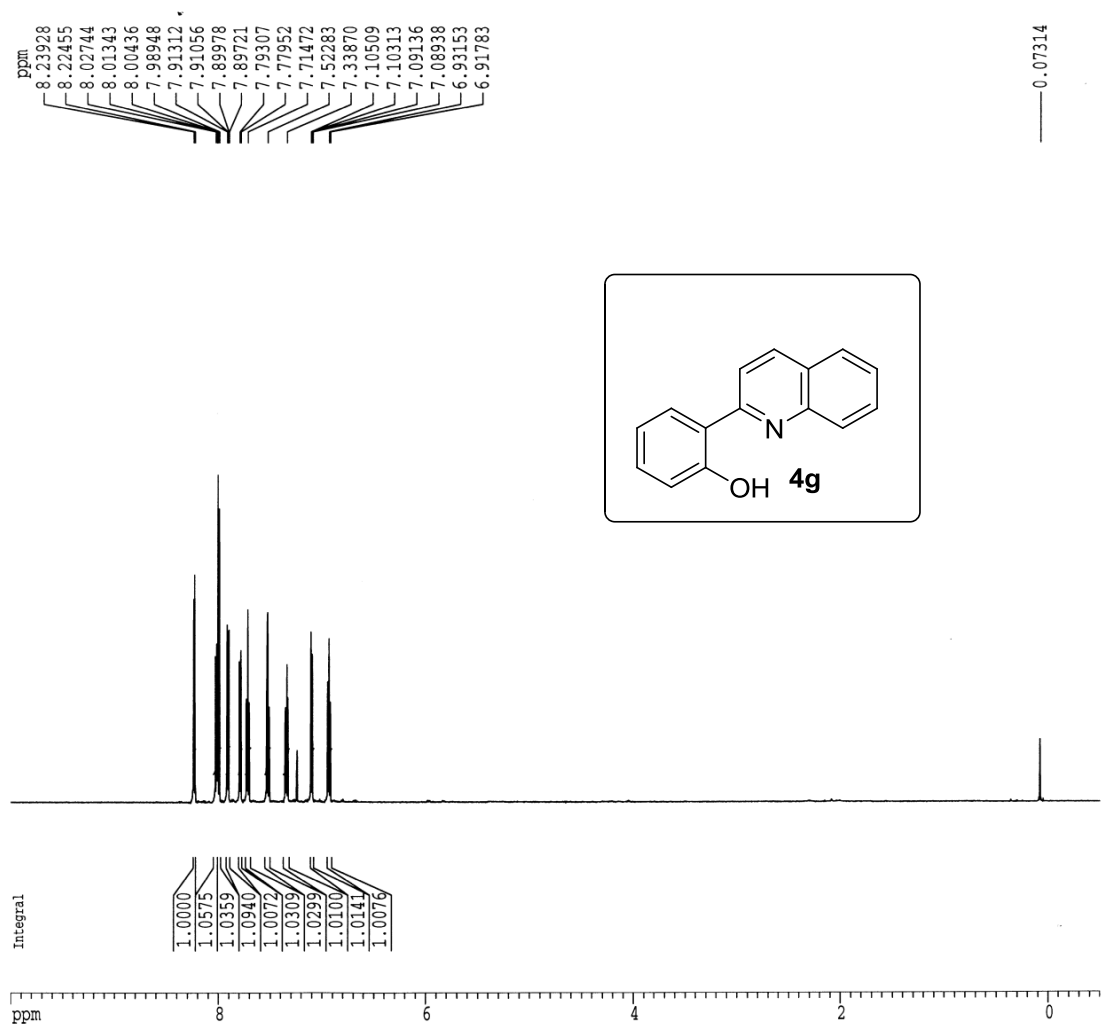

Current Data Parameters  
4E SBS-14-7-11  
PNO 2  
XCNO 1

- Acquisition Parameters  
Date\_ 20110714  
Time 15.55  
STRUM spect  
PROB 5 mm QNP 1H/1  
PROG zgpg  
PULPROG zgpg  
PCVENT CD2Cl2  
PCVENT 115  
PCVENT 0  
FREQ 45045.047 Hz  
NRES 1.374666 Hz  
AQ 0.3637748 sec  
SFO 2048  
AQ 11.100 usec  
RG 6.50 usec  
RG 303.5 K  
RG 3.50000000 sec  
RG 0.03000000 sec  
RG 3.40000010 sec  
RG 0.00000000 sec  
RG 0.01500000 sec

===== CHANNEL f1 =====  
P1 13C  
P2 4.80 usec  
P3 0.00 dB  
P4 150.6352381 MHz

===== CHANNEL f2 =====  
PRG2 waltz16  
P2 1H  
P3 92.00 usec  
P4 120.00 dB  
P5 9.00 dB  
P6 14.00 dB  
P7 599.0029950 MHz

- Processing parameters  
PC 65536  
PC 150.6186779 MHz  
PC 1H  
PC 0  
PC 3.00 Hz  
PC 0  
PC 1.00

NMR plot parameters  
PC 20.00 cm  
PC 4.50 cm  
PC 200.000 ppm  
PC 30123.74 Hz  
PC 0.000 ppm  
PC 0.00 Hz  
PC 10.00000 ppm/cm  
PC 1506.18677 Hz/cm

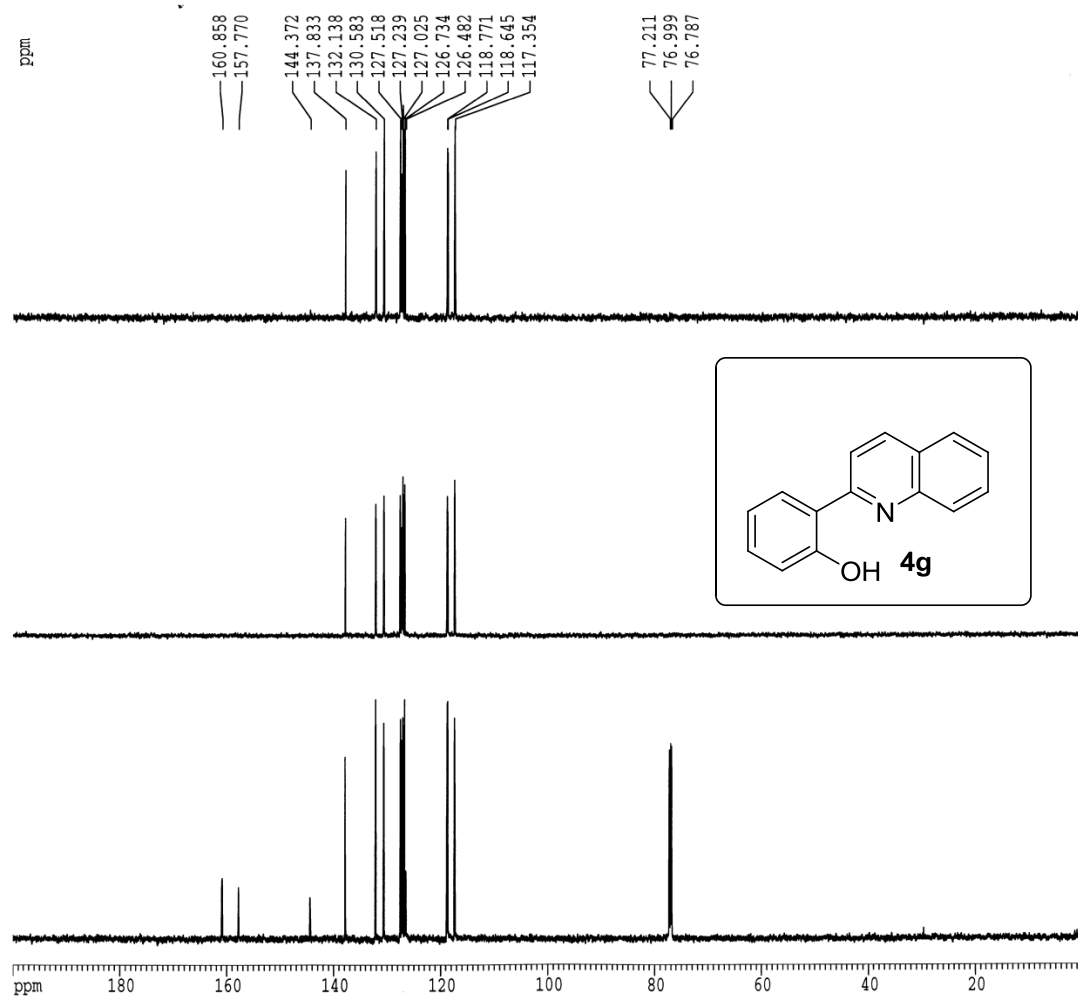

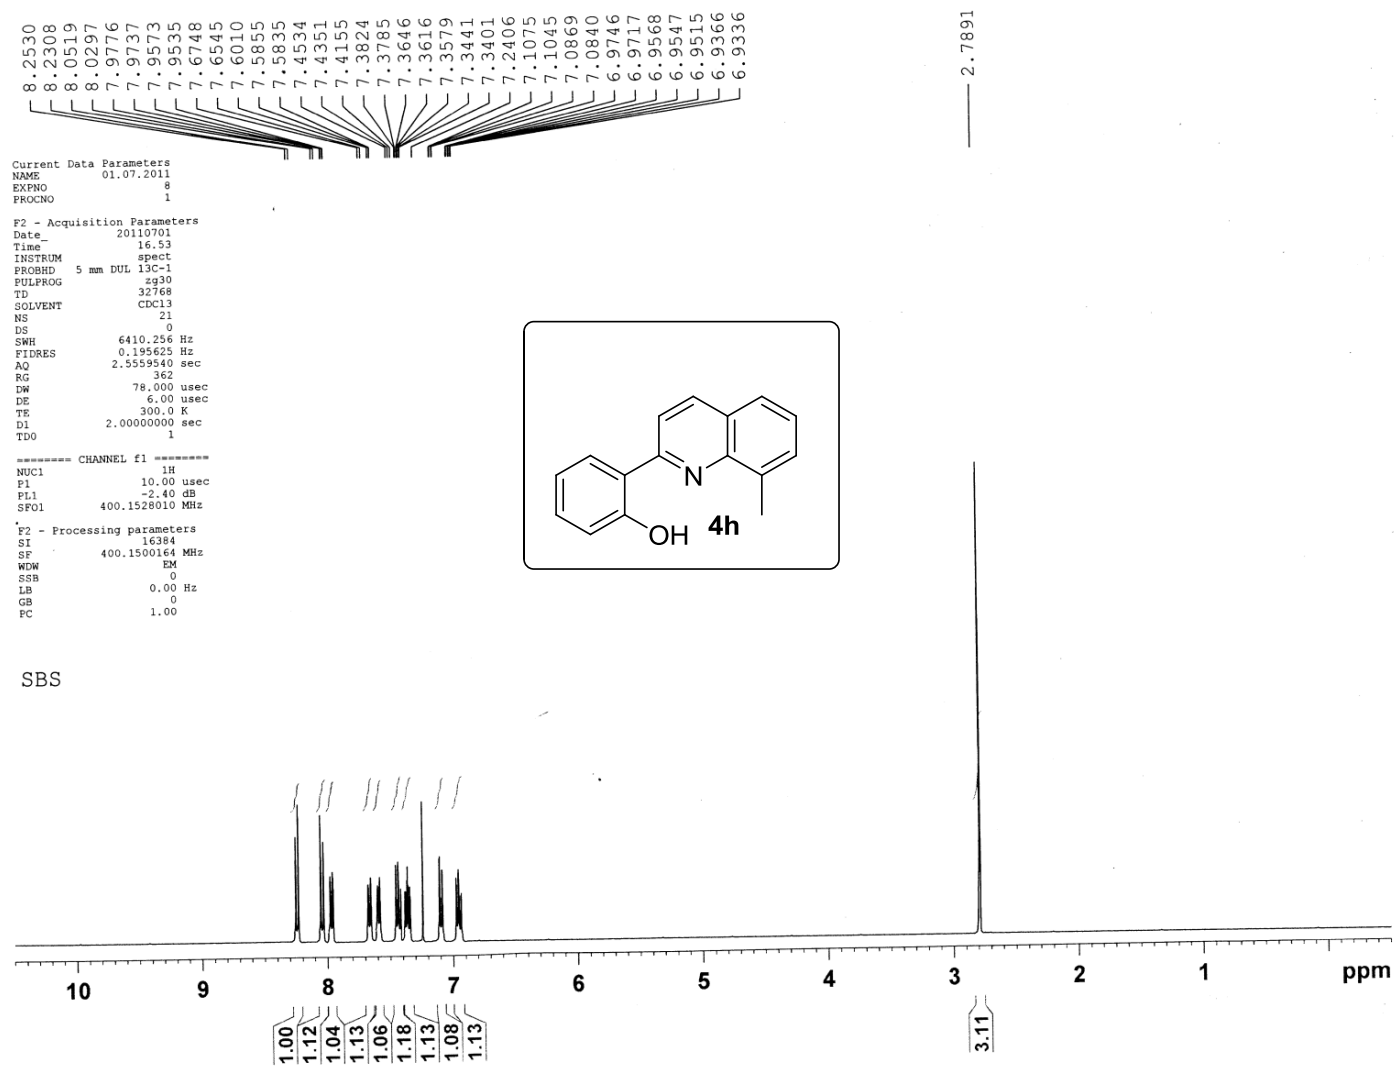

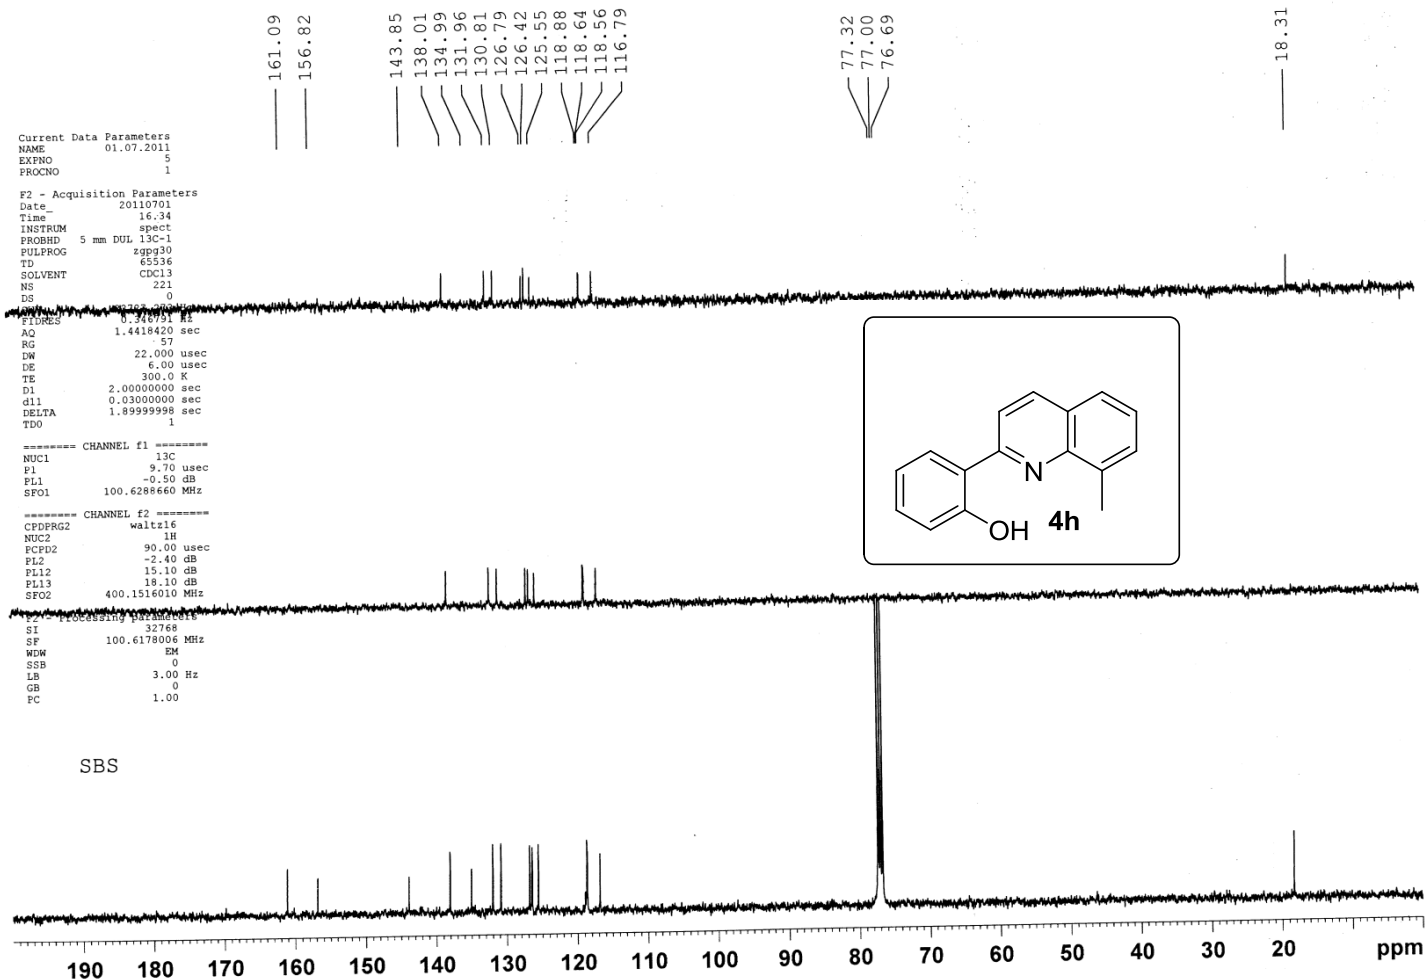

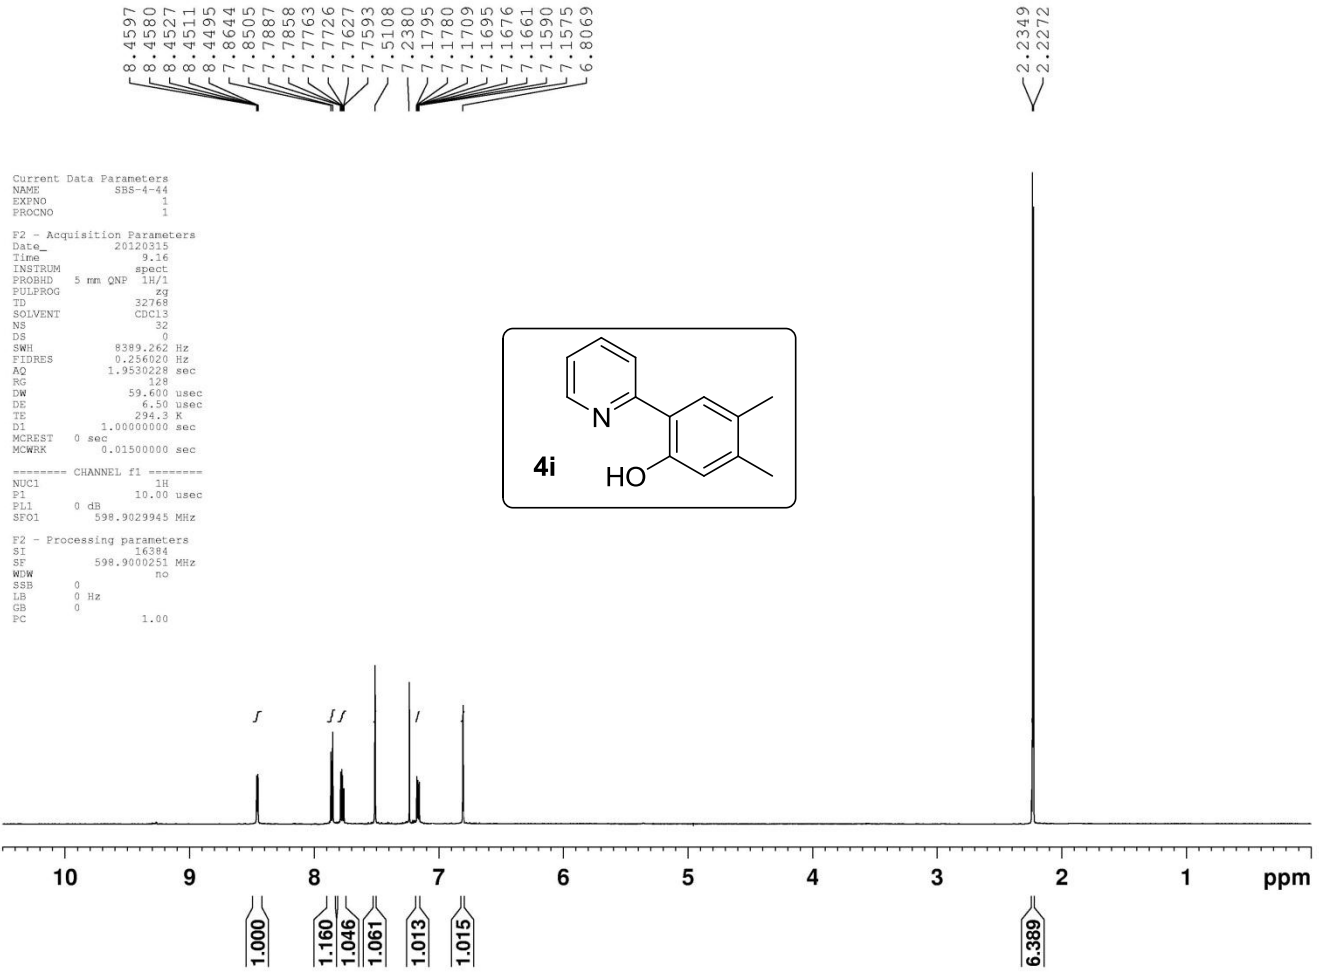

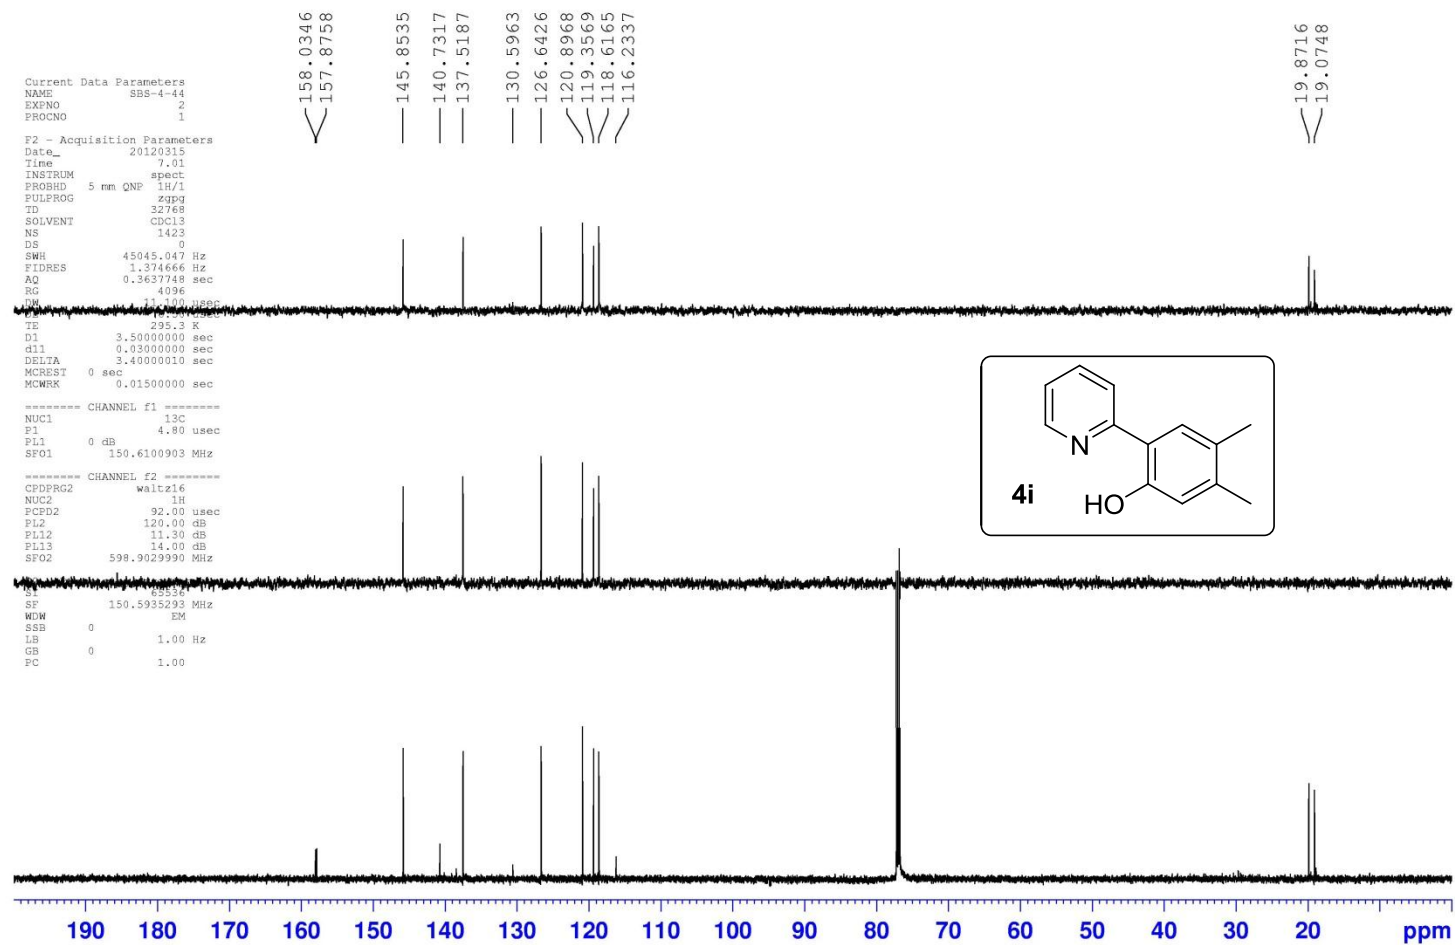

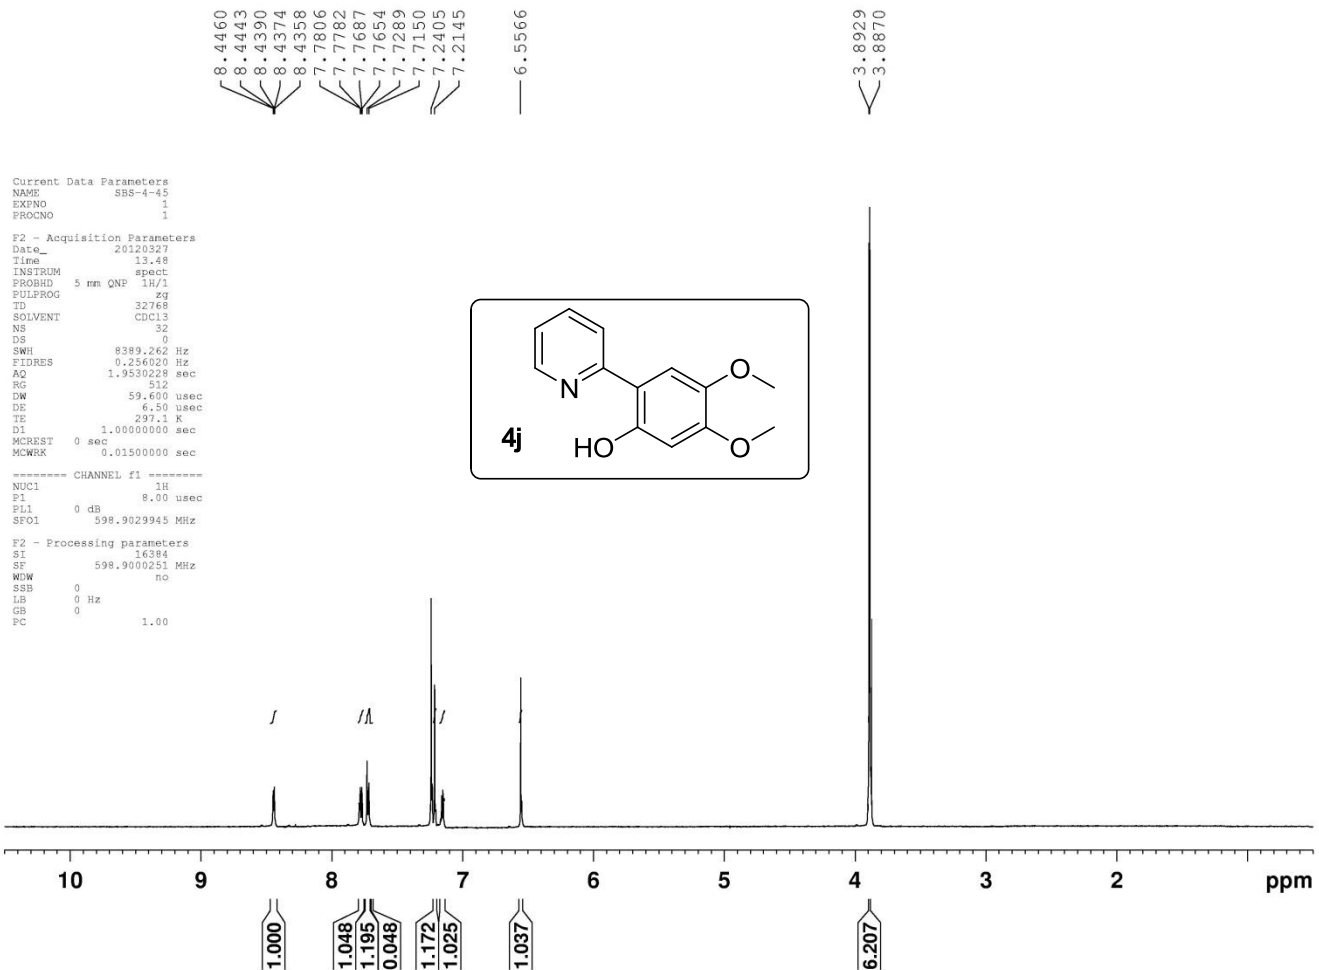

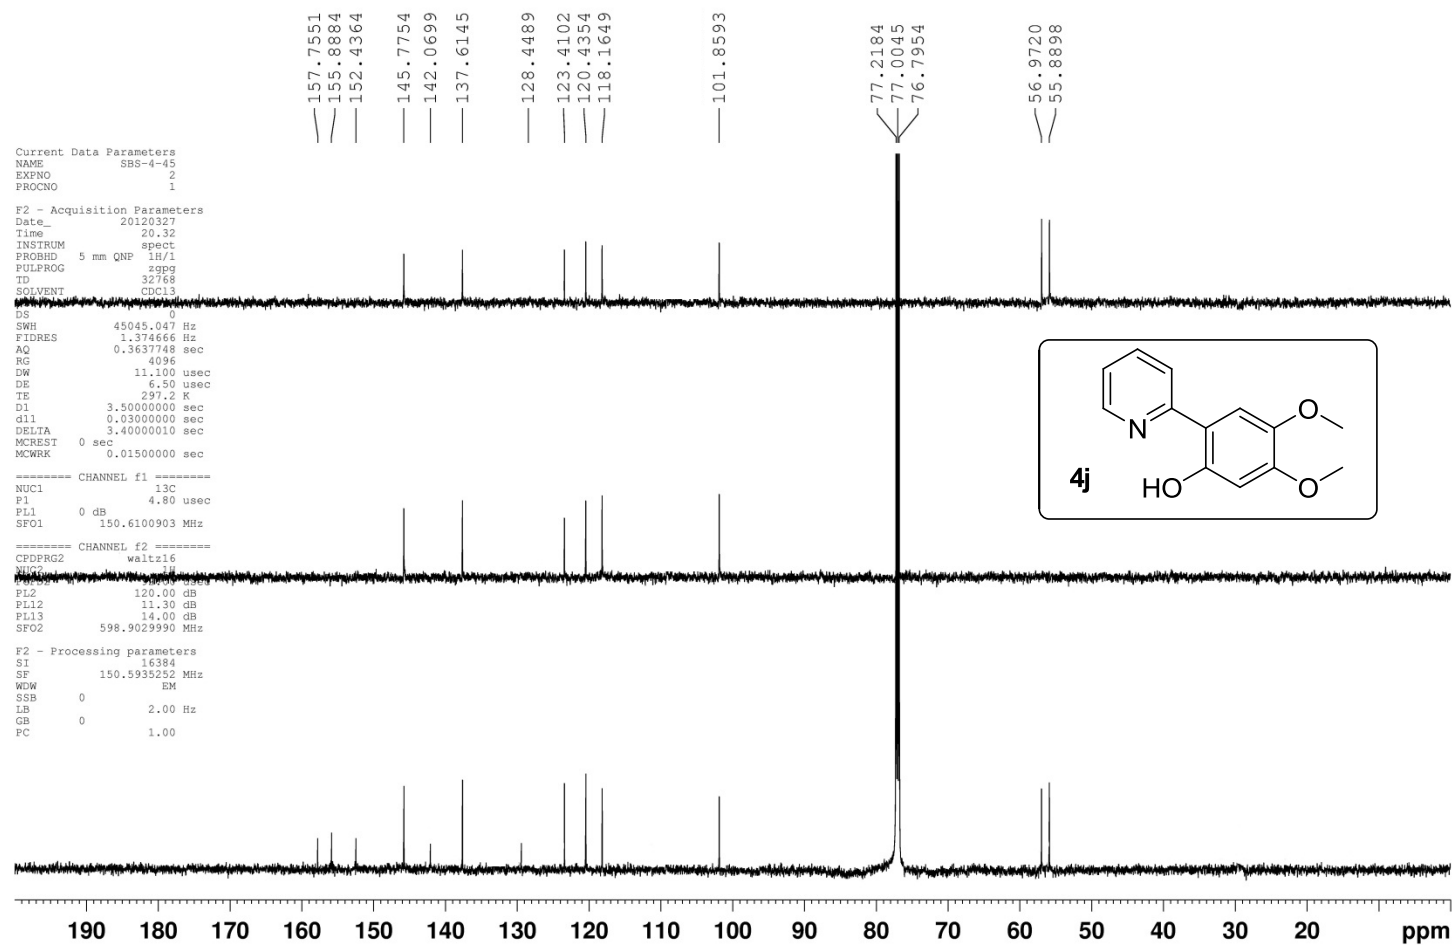



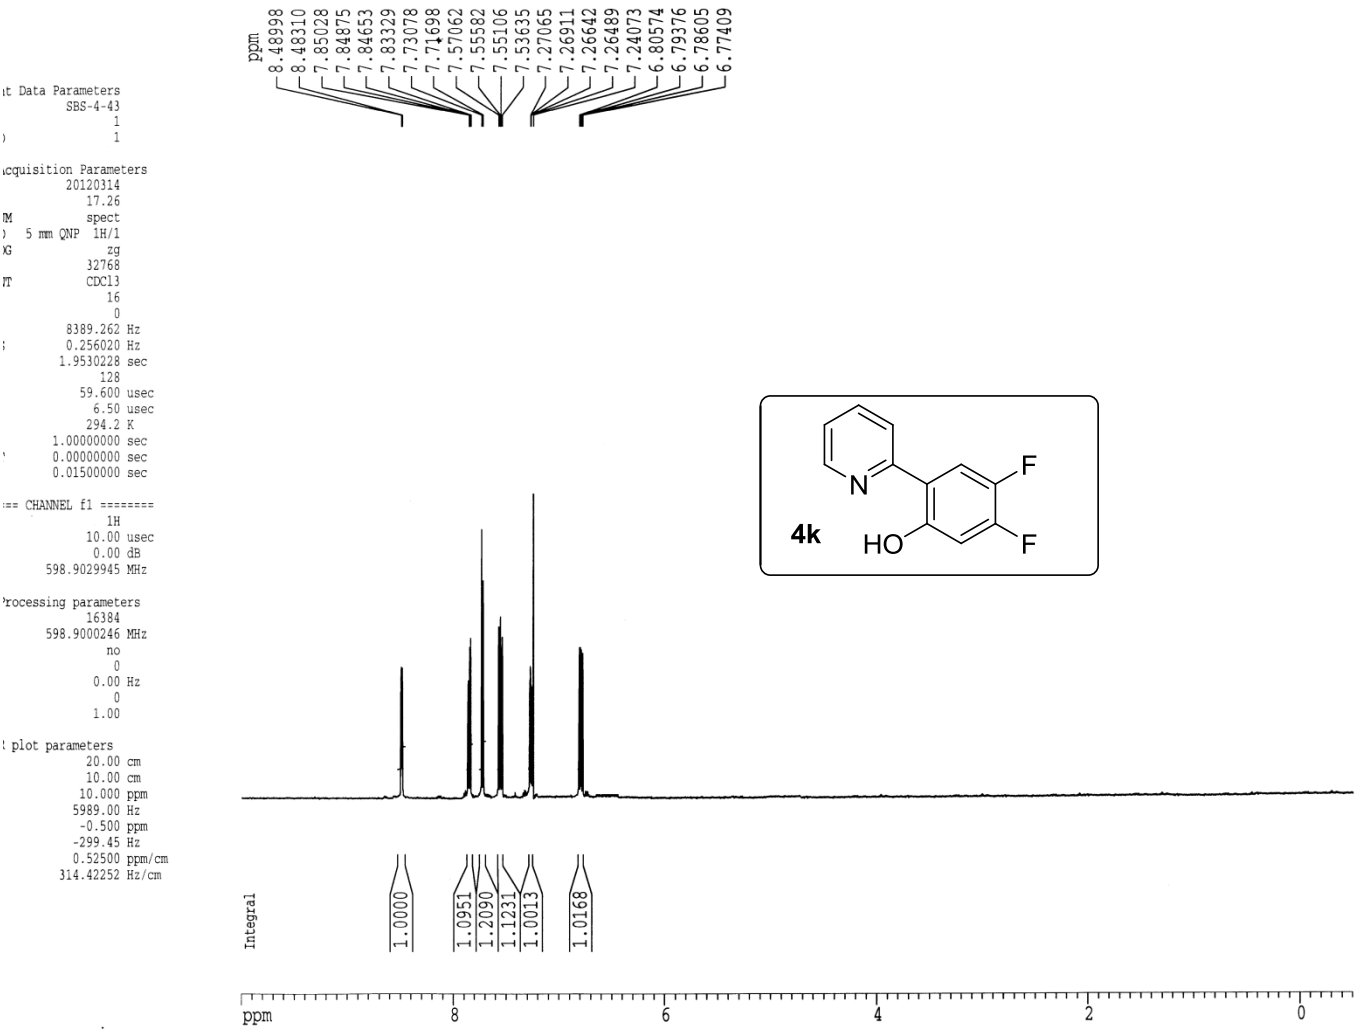

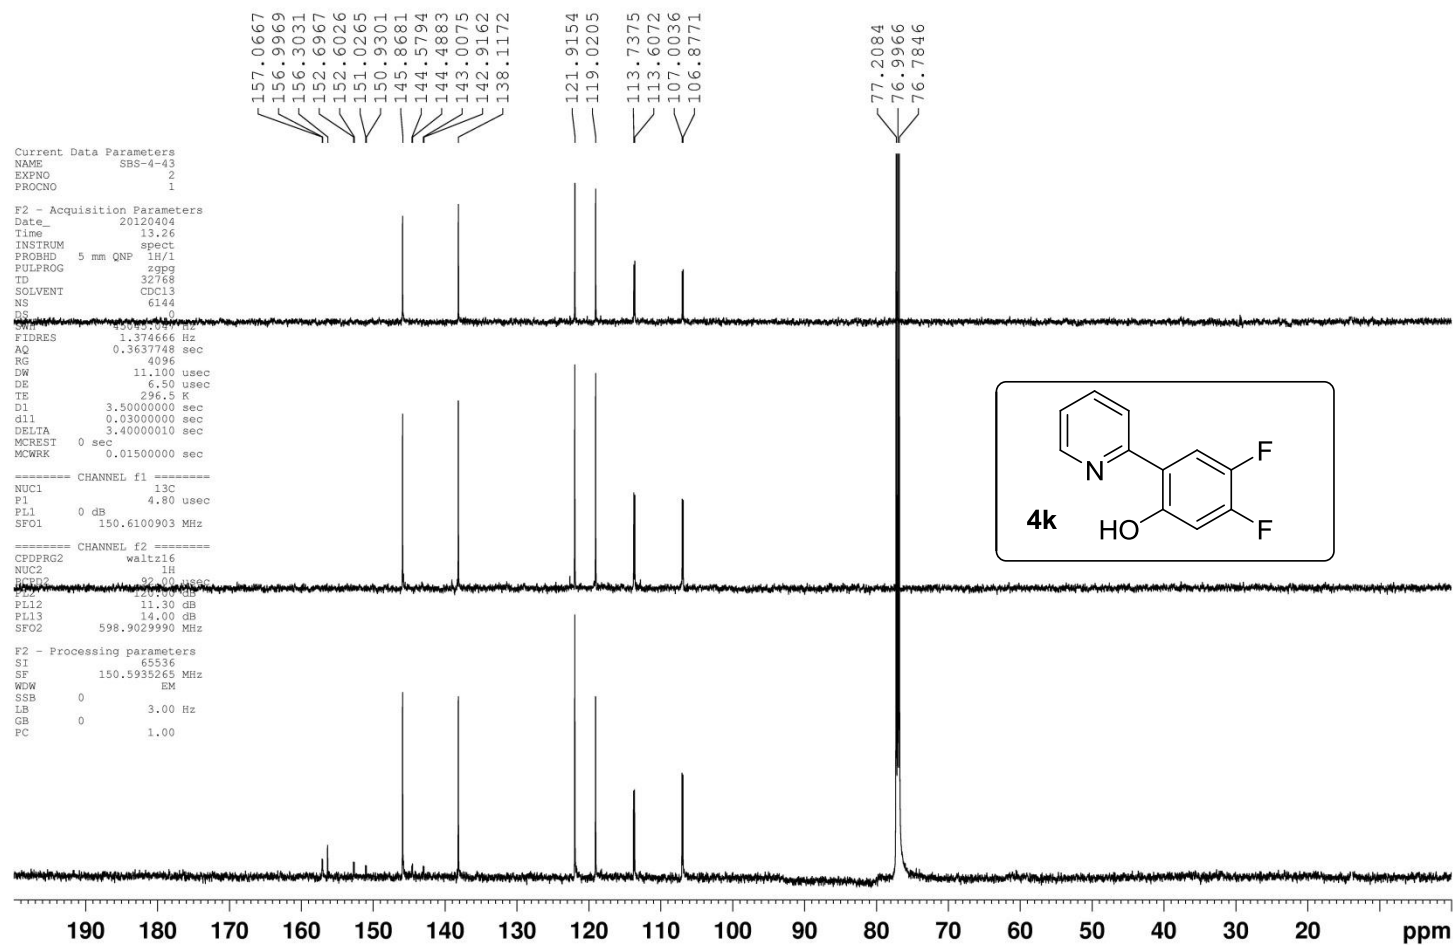

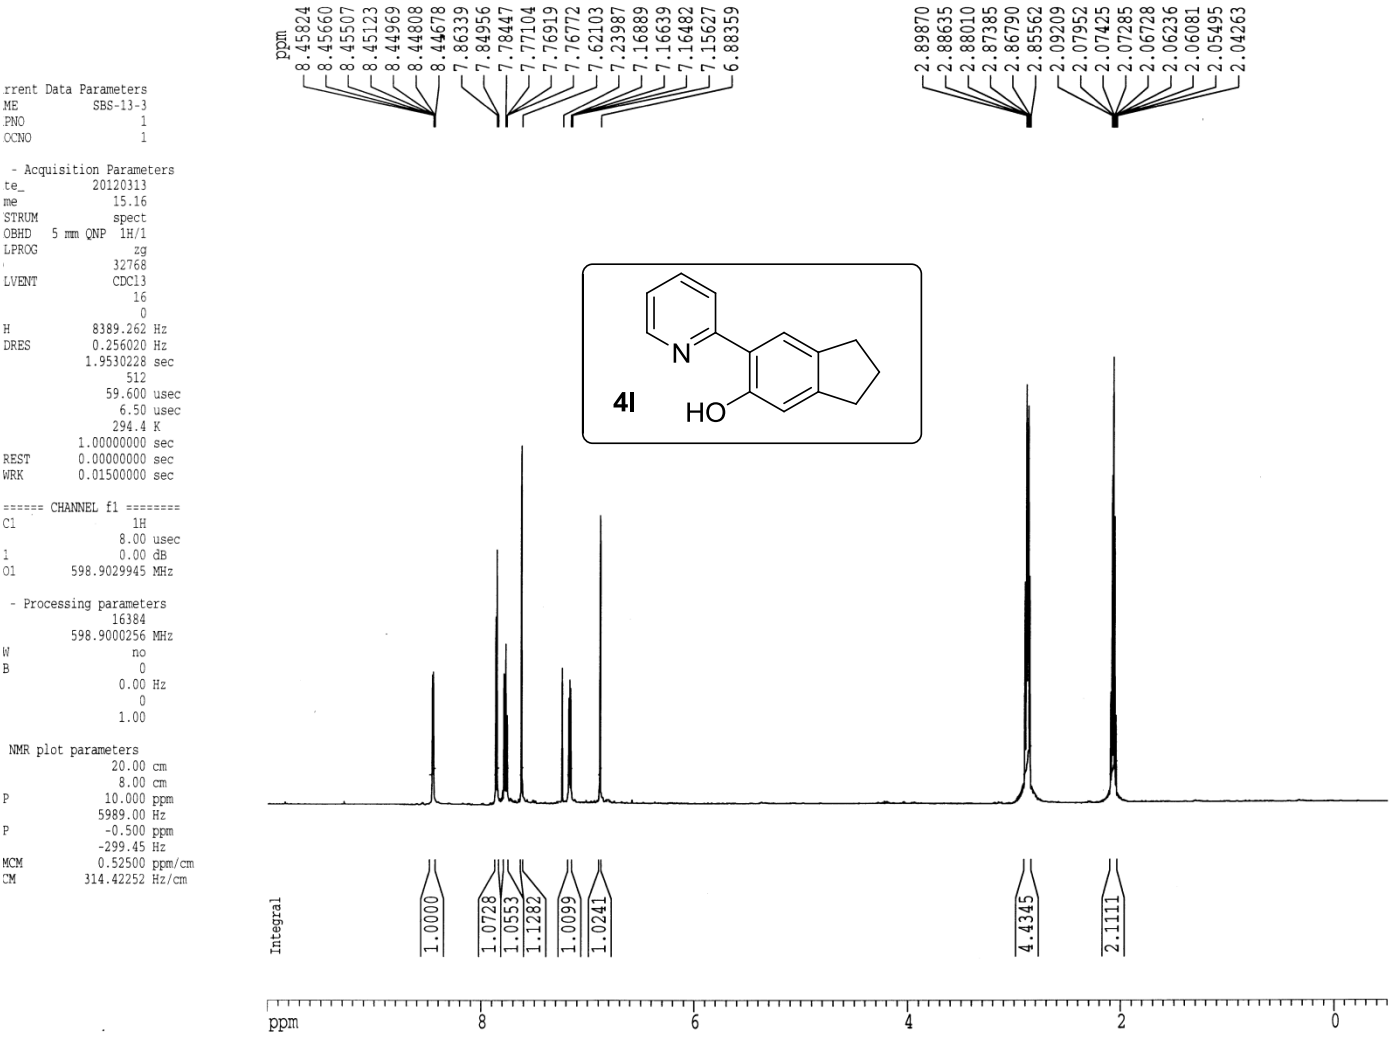

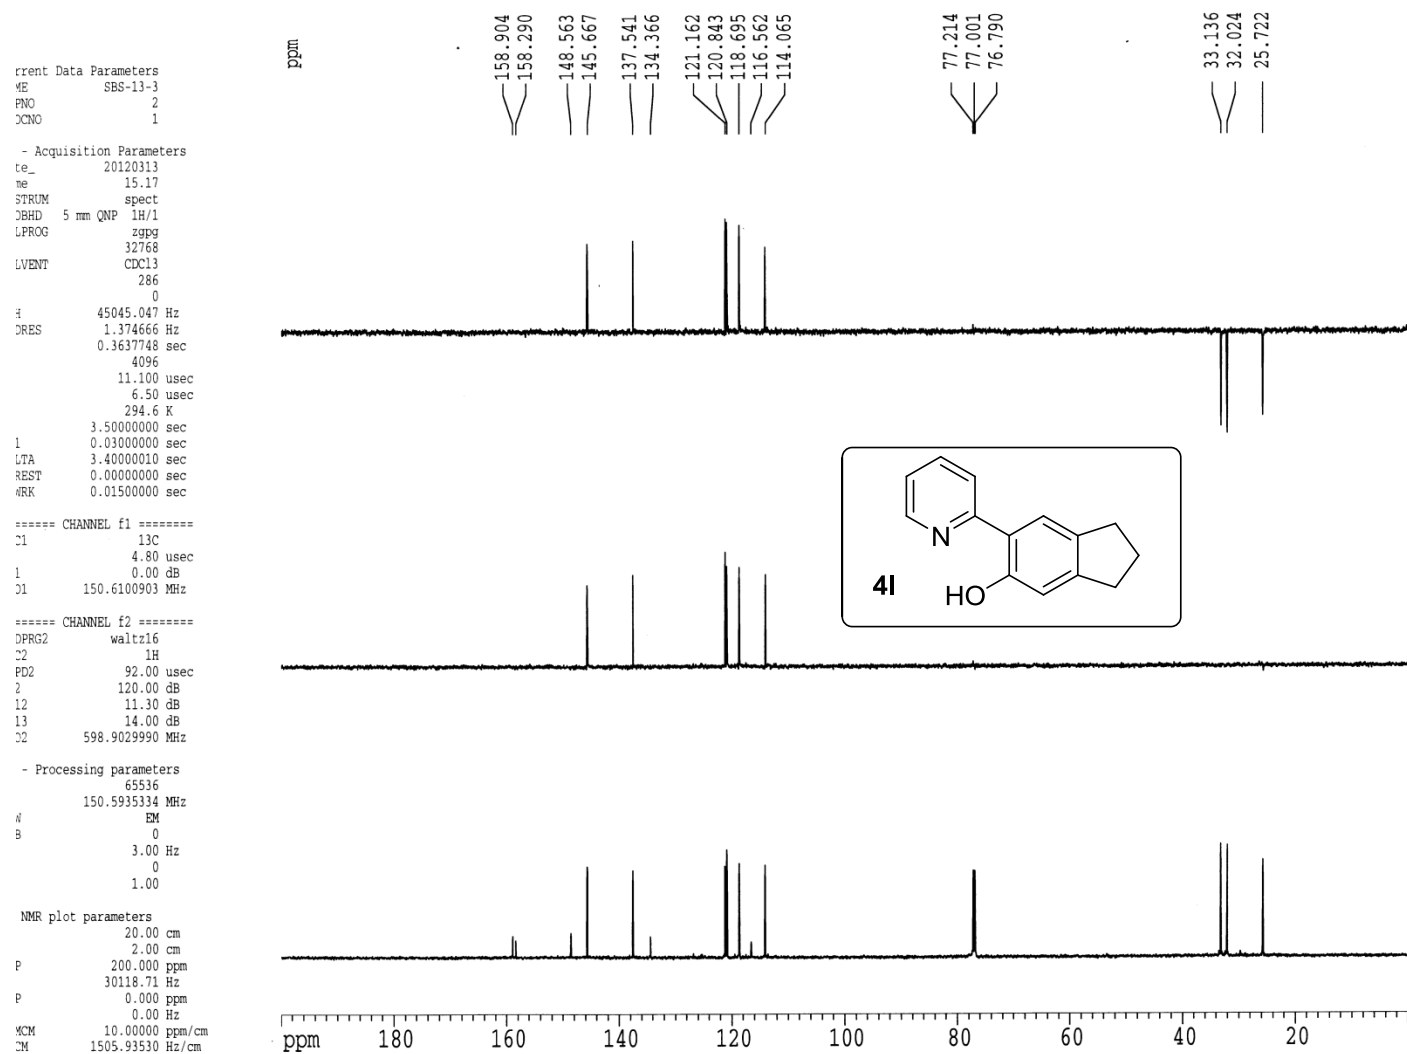

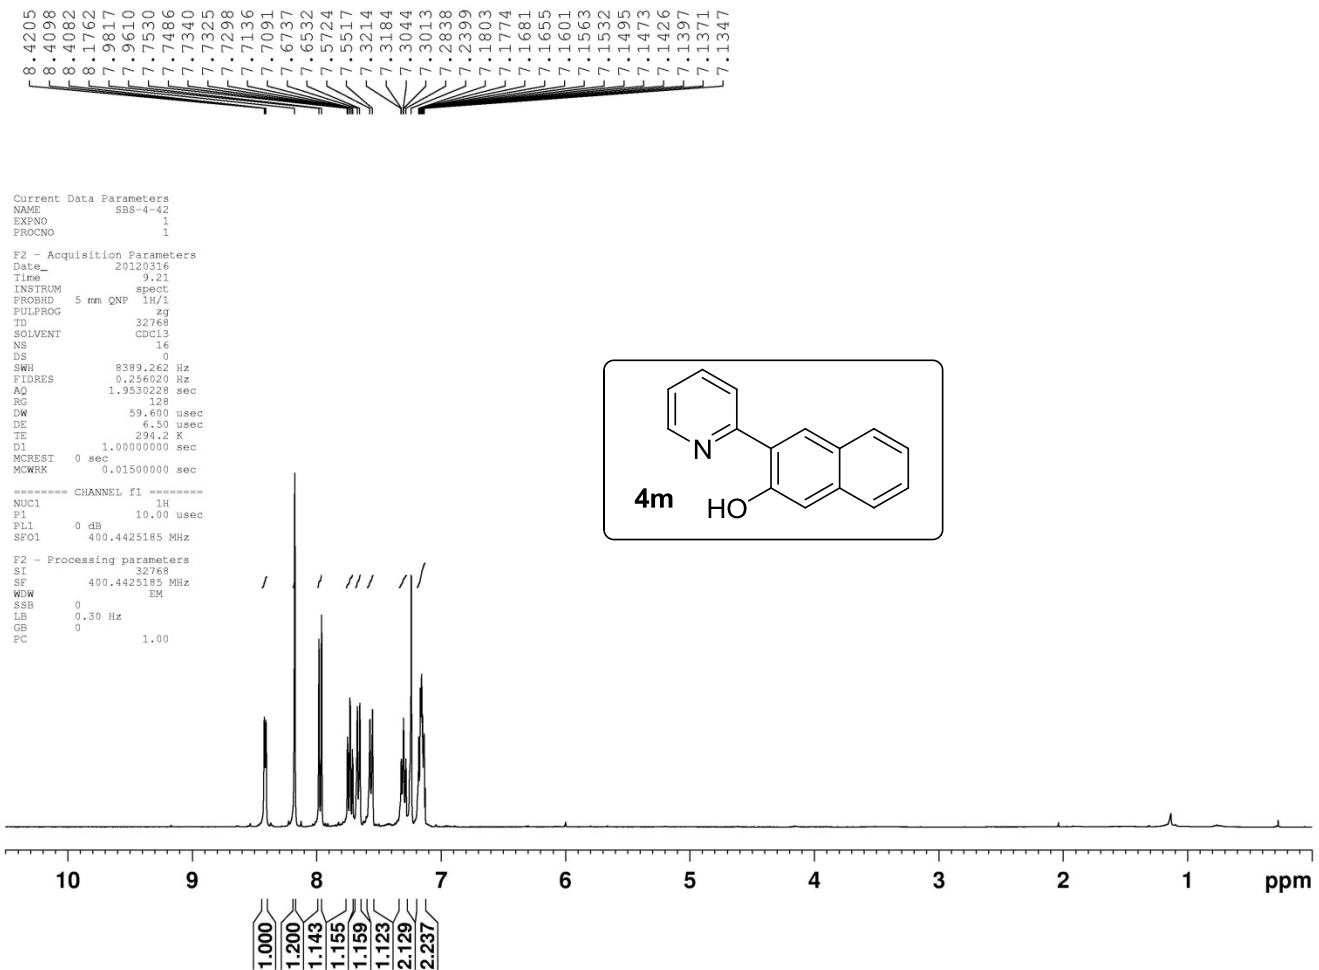

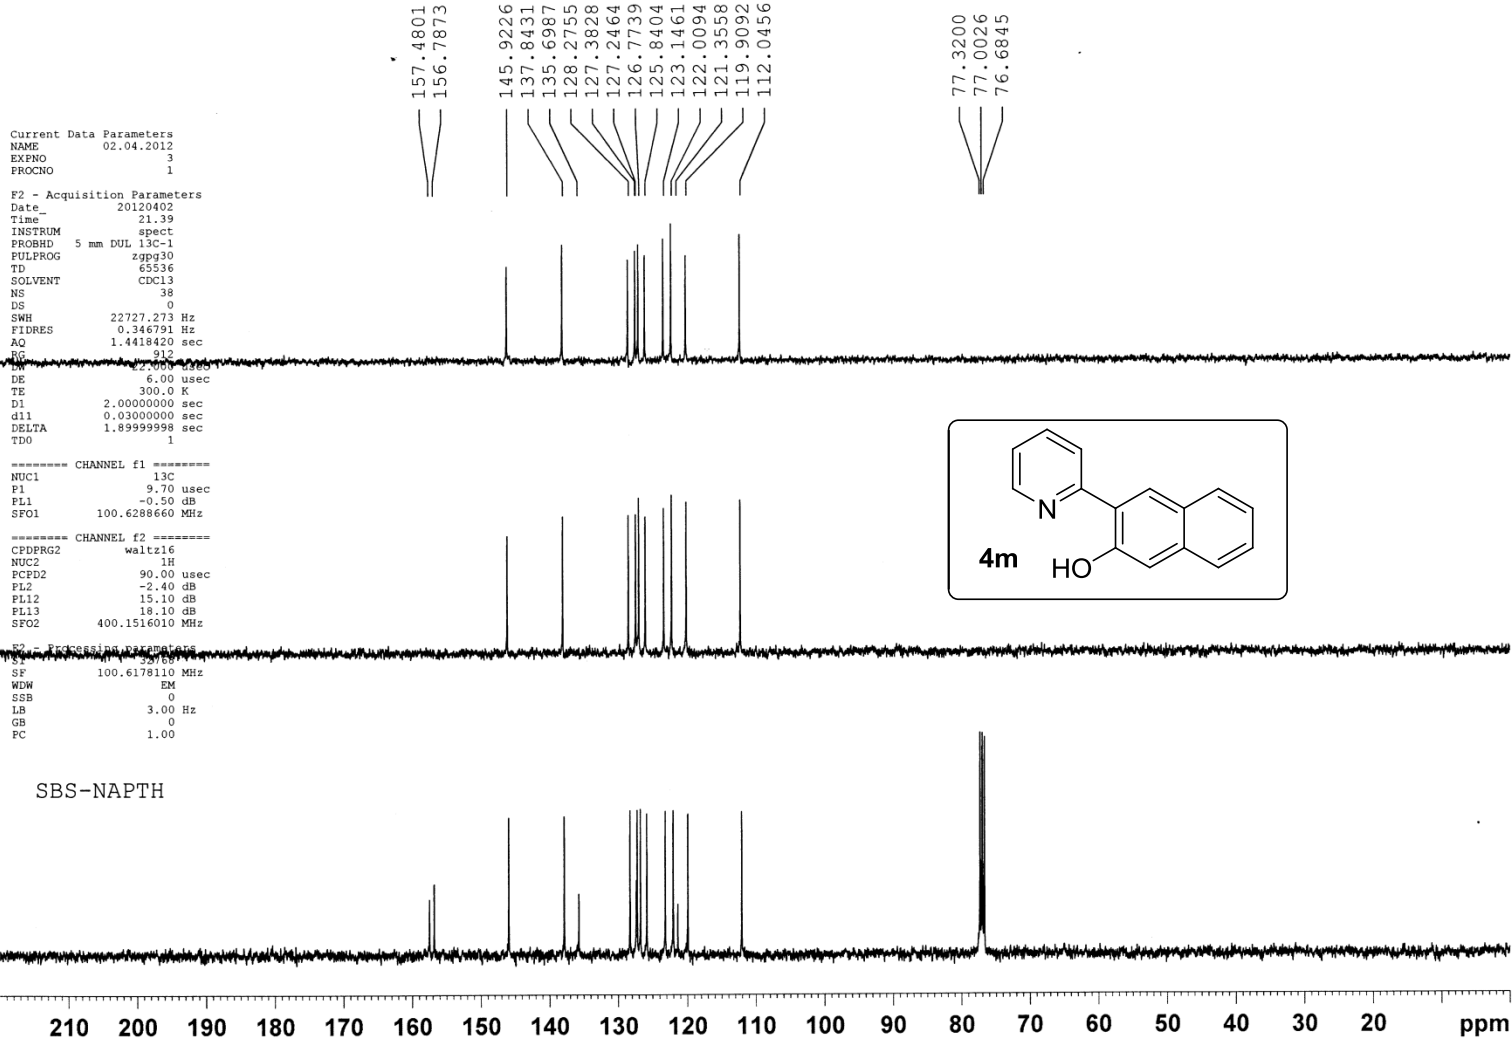

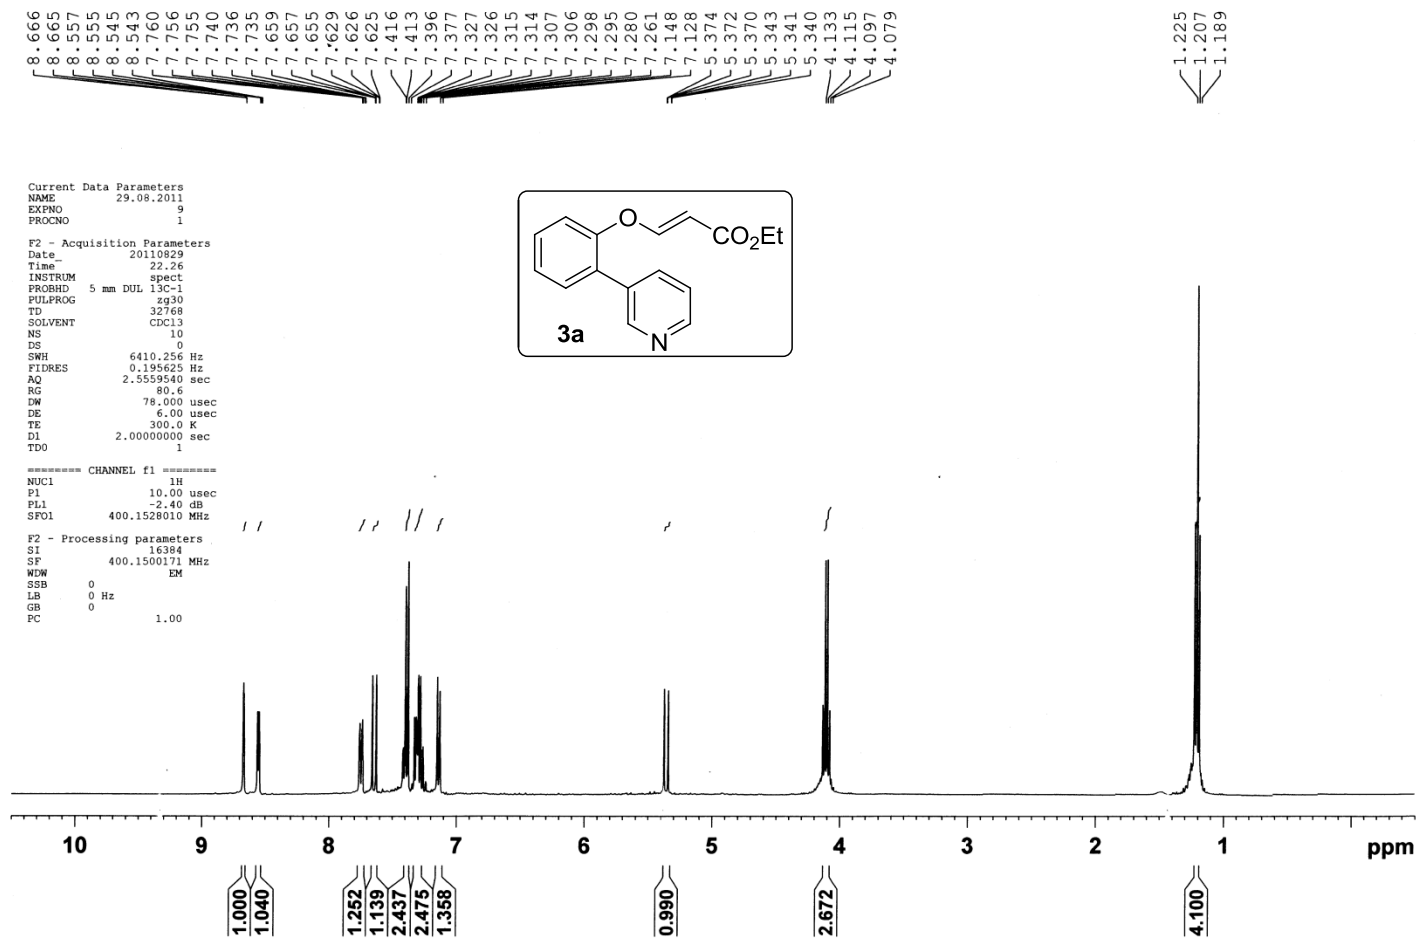

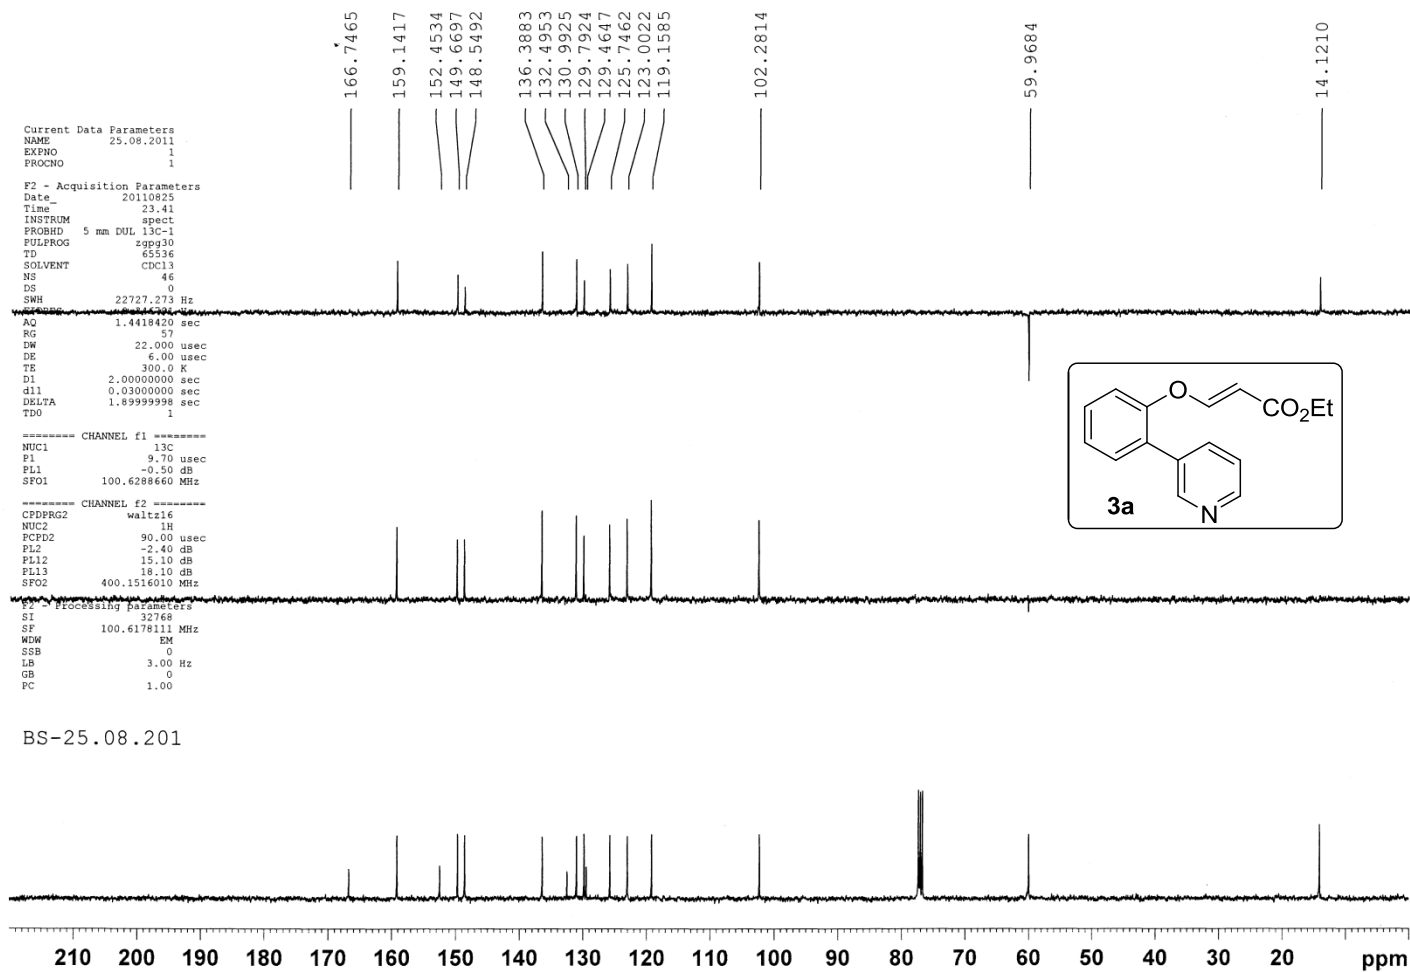



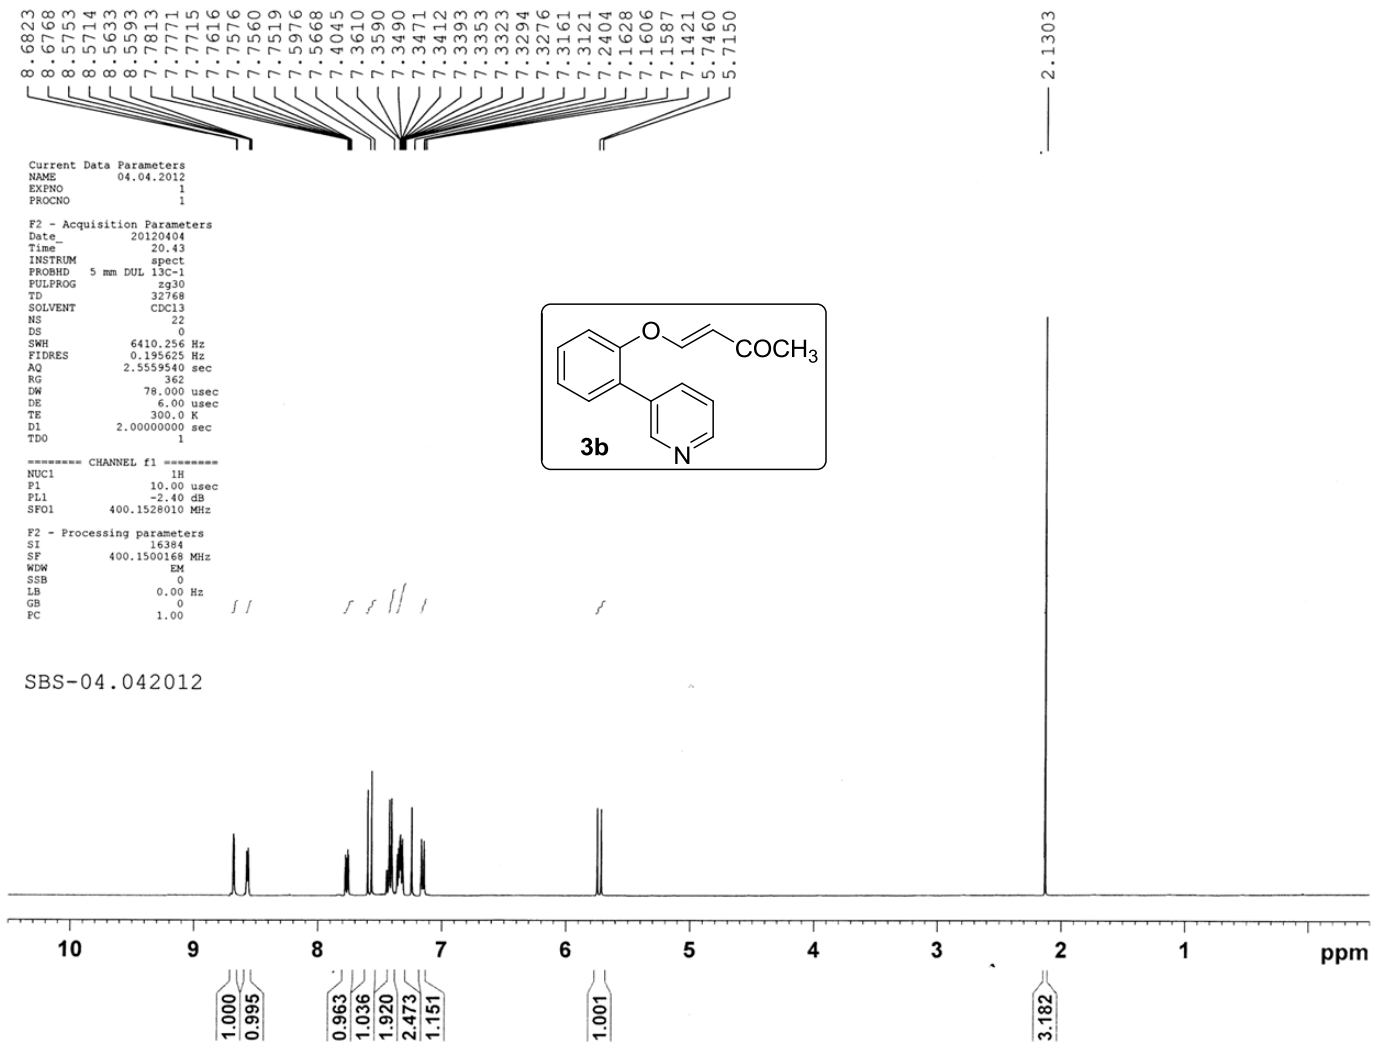

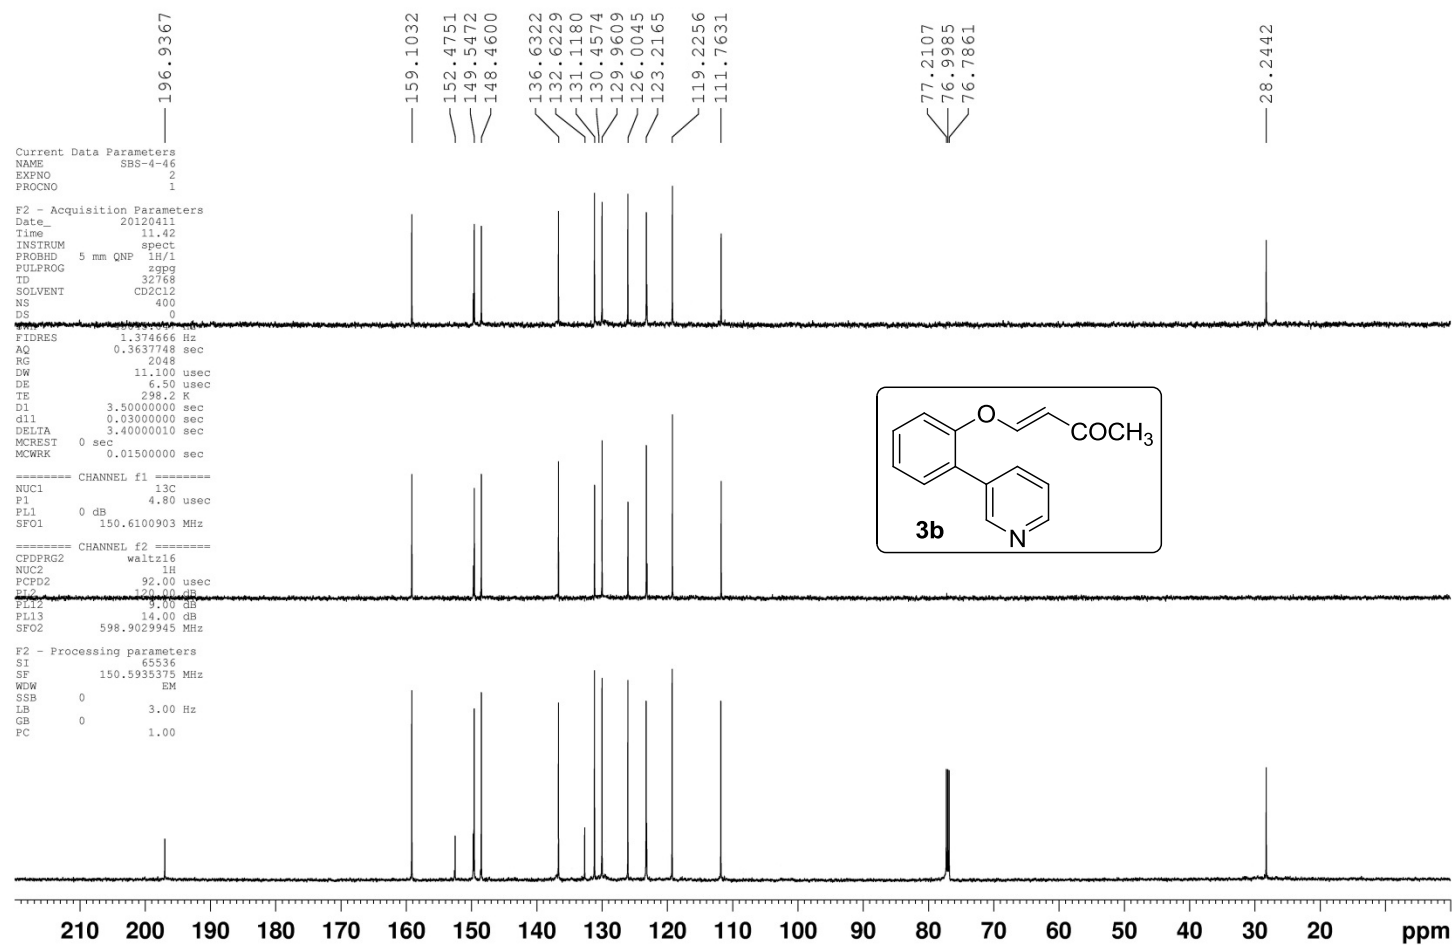

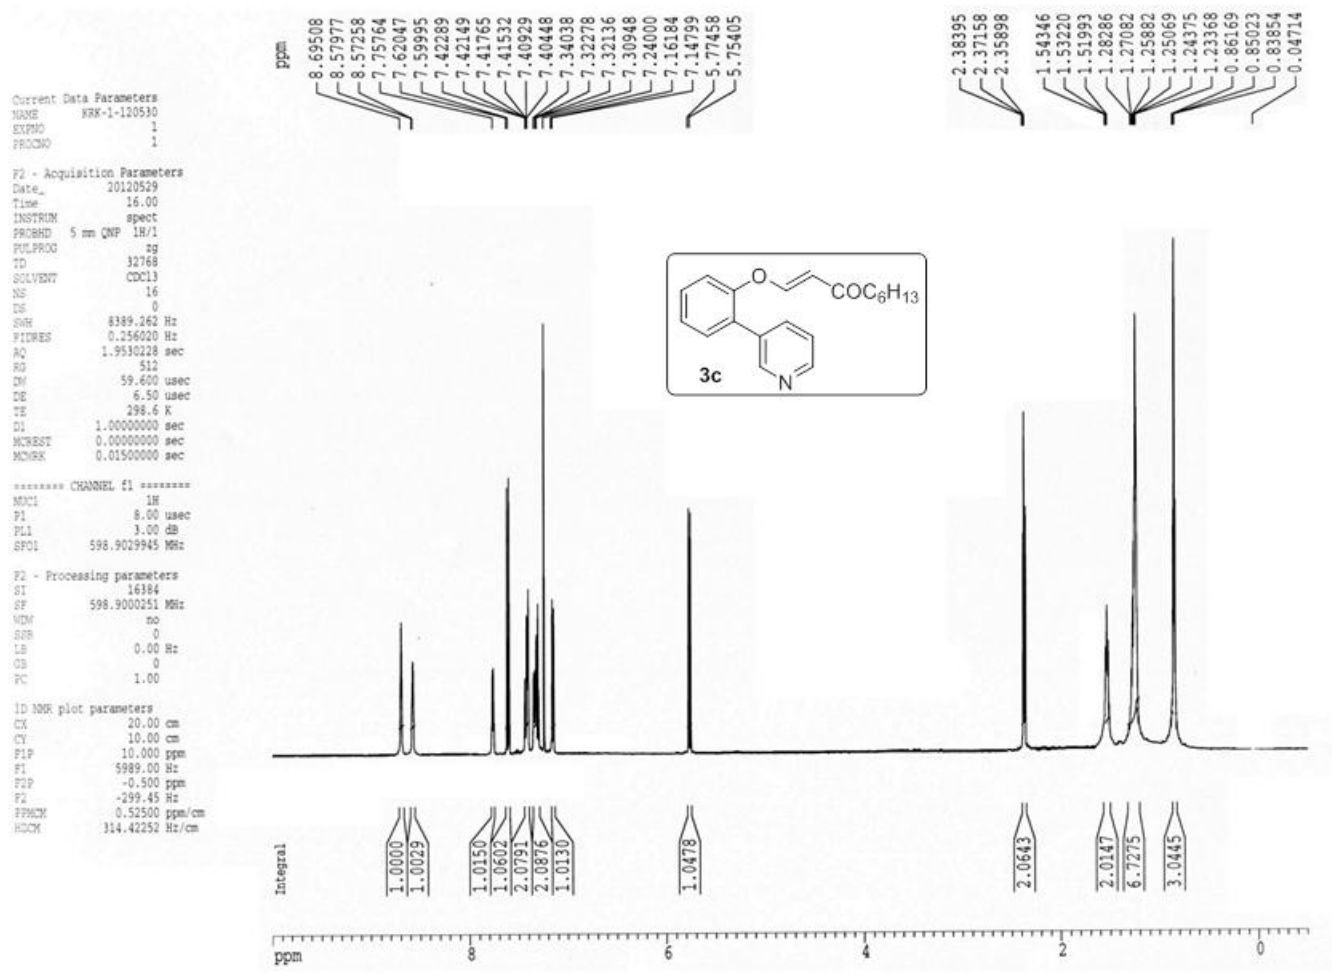

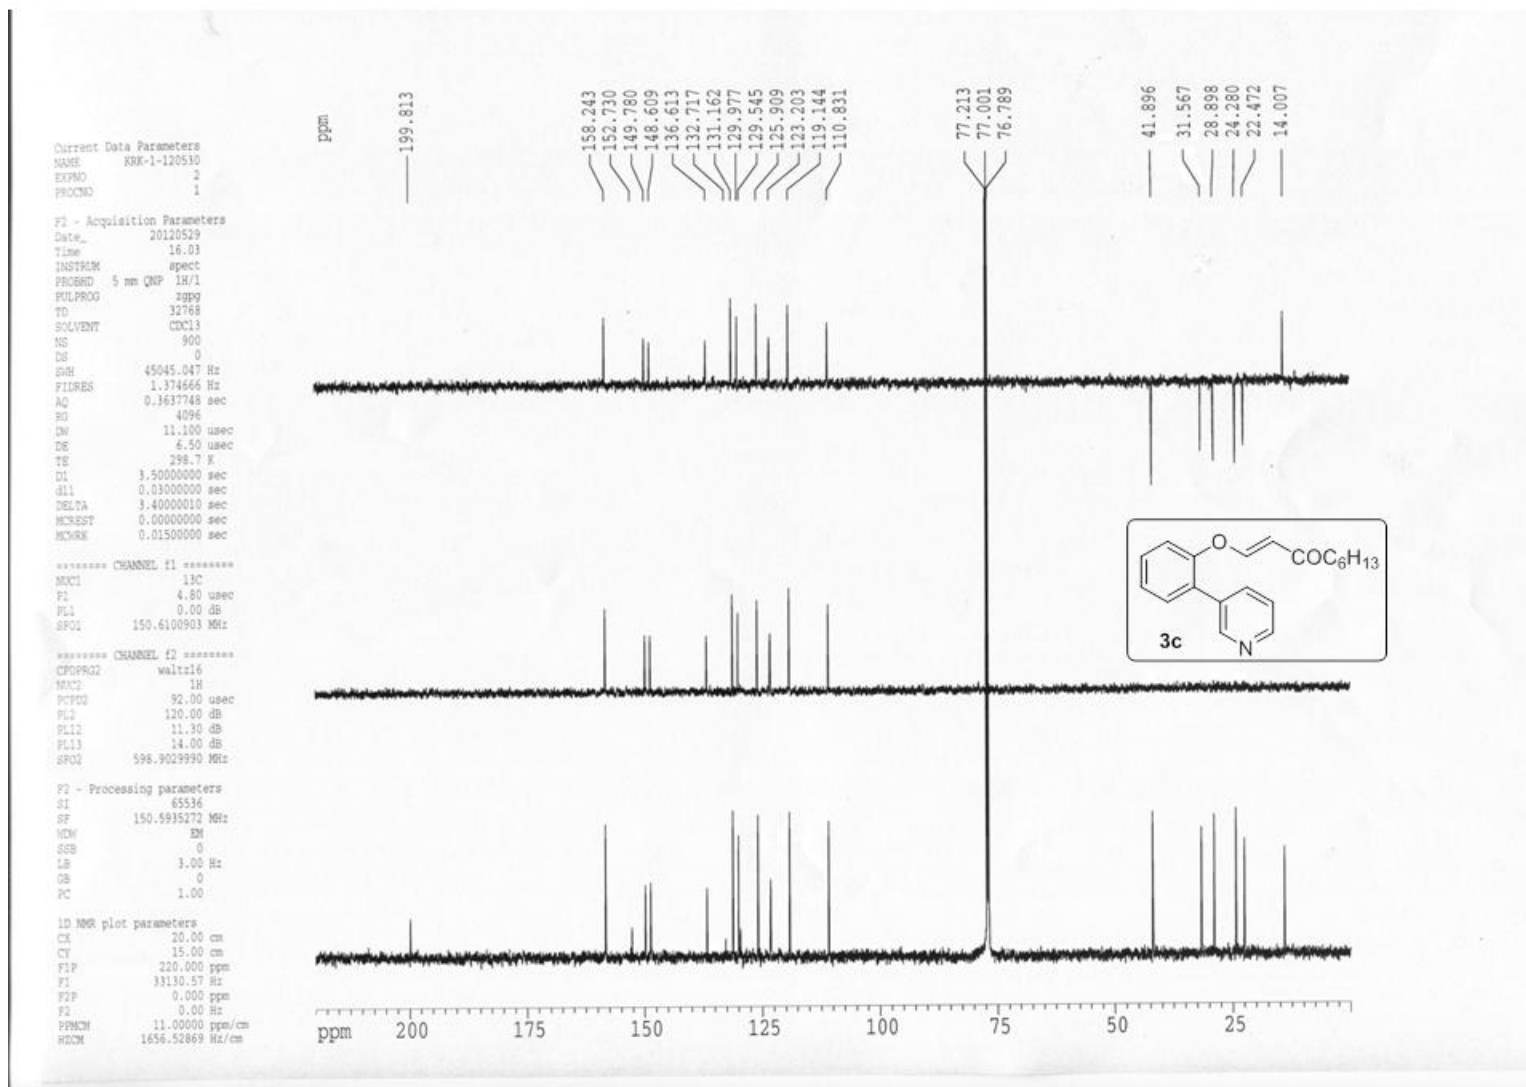

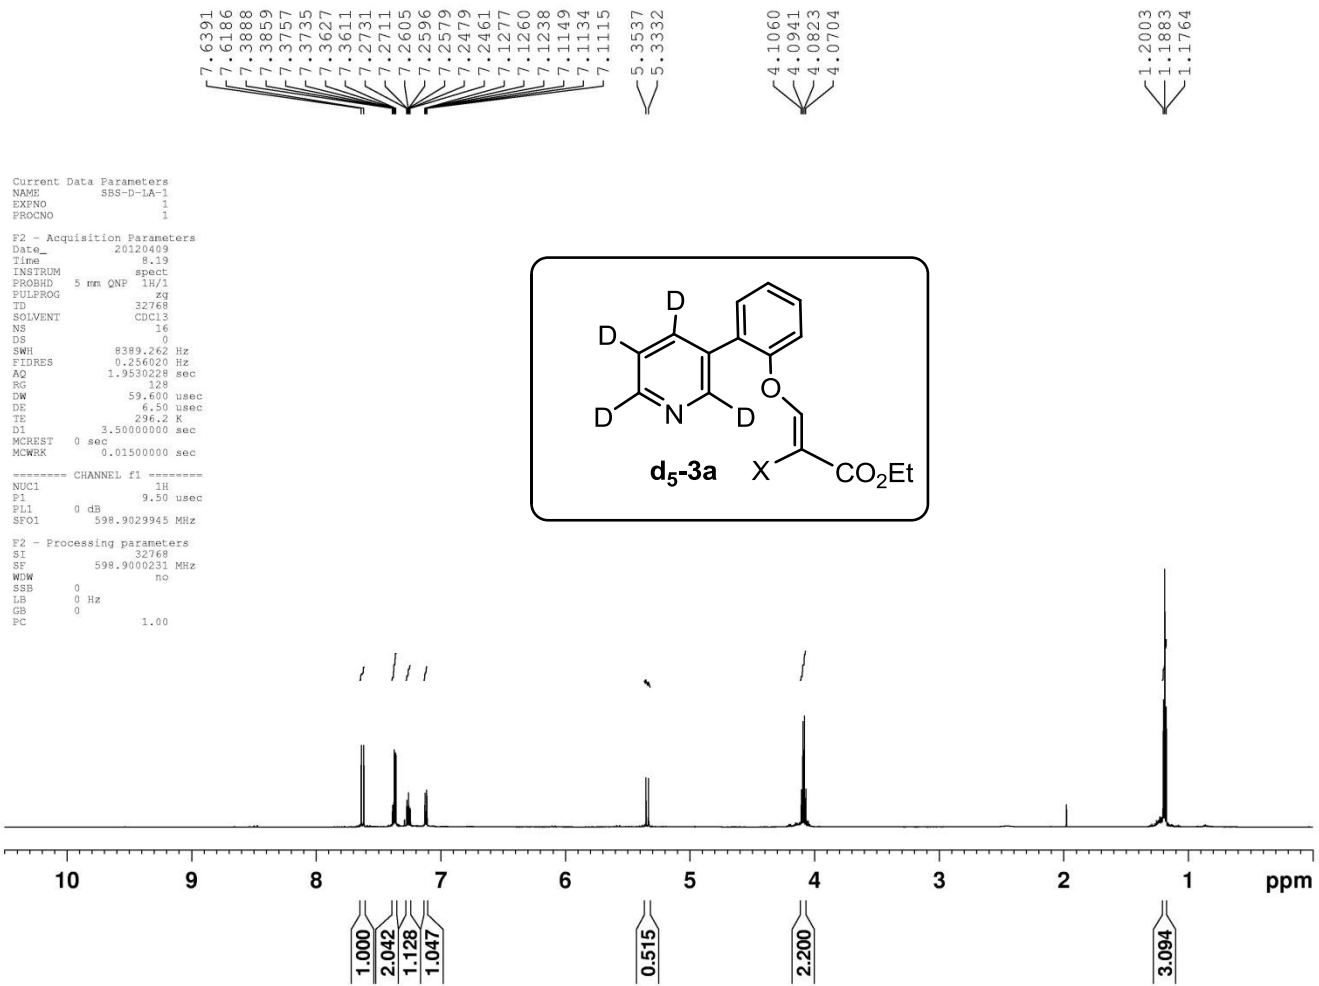

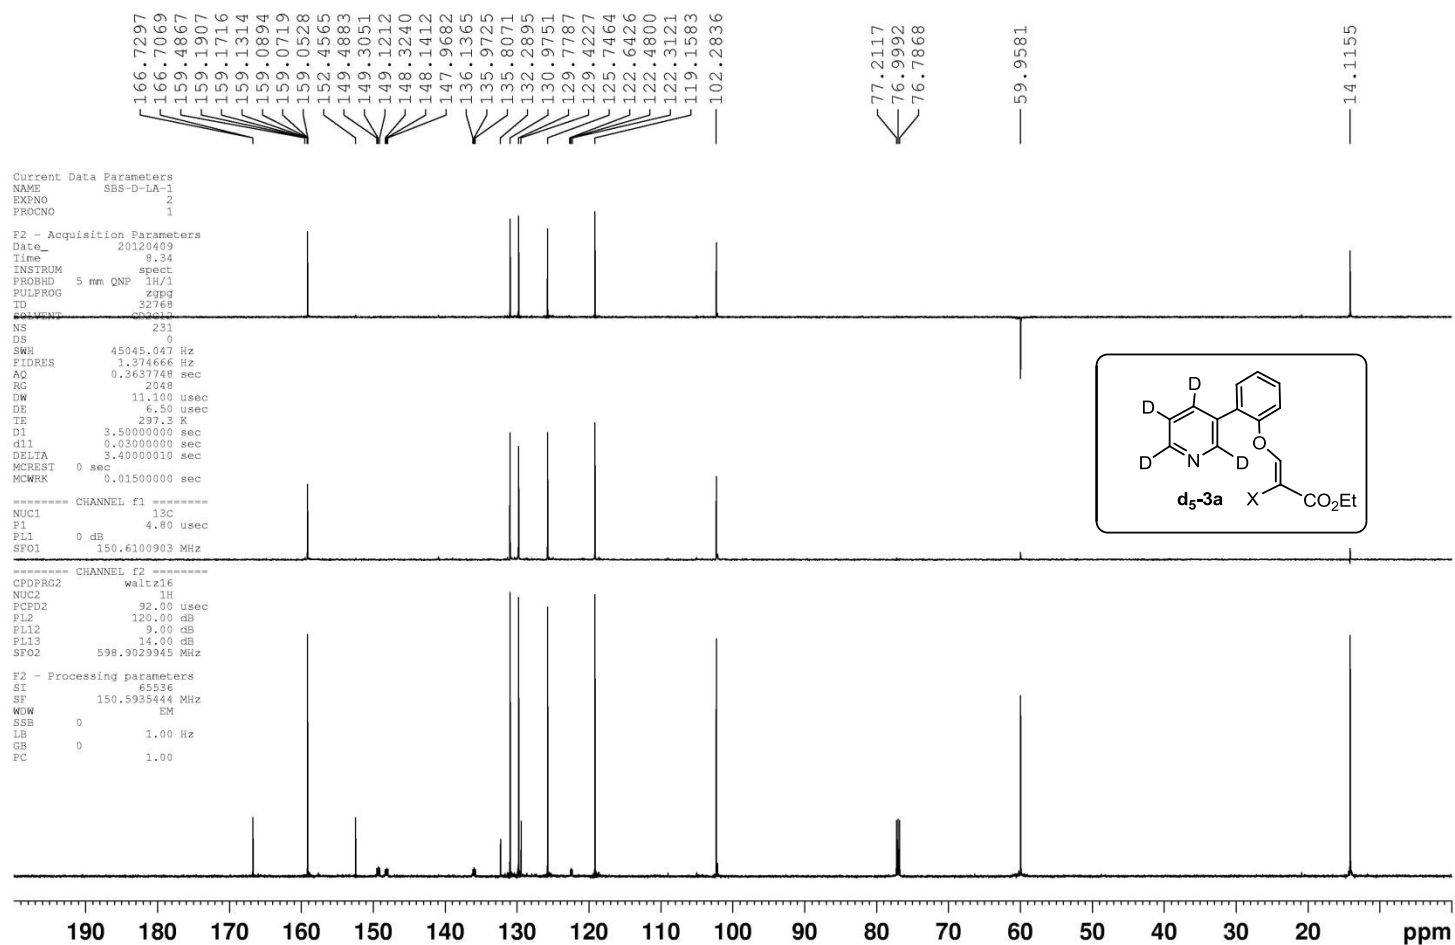

Supplement: c2ob26130h.pdf [file c2ob26130h.pdf]
